# Supplementary material for: Review and syntheses: Ocean alkalinity enhancement and carbon dioxide removal through marine enhanced rock weathering using olivine
Source: Copernicus journal article supplement (doi:10.5194/bg-22-355-2025), 2025-01-21
Supplement: Supplementary file 1 [file bg-22-355-2025-supplement.zip]

## Sheet: Metadata
Olivine dissolution data
Column name	Parameter	Unit
Temp [C°]	Temperature	C°
pH(initial)	pH at start of experiment	-
Duration of experiment [hr]	Duration of the experiment	hours
Ionic strength [mol l-1]	Ionic strength of solution	mol l-1
Grainsize min [um]	Lower grainsize limit	μm
Grainsize max [um]	Upper grainsize limit	μm
BET method	Gas used for BET analysis	-
Initial SSA [m2 g-1]	Specific surface area measured at the start of the experiment	m2 g-1
Stir speed min [RPM]	Lower limit of stiring speed used	rotations minute^-1
Stir speed max [RPM]	Upper limit of stiring speed used	rotations minute^-1
Fo	Mole fraction of forsterite in the olivine	-
pCO2 [atm]	Atmospheric concentration of CO2	atm
Rs	Grain roughness	-
Si/Mg	The elemental release rate used for calculation of olivine dissolution rates	Si/Mg
log r[mol/m2/s]	Log release rate per unit of surface area	log mol m-2 s-1
r [mol/m2/s2]	Release rate per unit of surface area	mol m-2 s-1
Surface area type	Geometric or BET surface area	GEO/BET
Reference	Source of original data	-
UseData*	Whether data is used in figures or not, "MARKED" data are equivalent to "additions" marked points in figure 4	YES/NO/MARK
Comment	Additional information regarding experiment	-
*Data is "MARK" when additions to experiment were made. For more info on exclusions (NO), see supplementary file 1
Olivine reserve data
Column name	Description	Unit
Country	Country where reserve is found	-
Region	Region or province where reserve is found	-
Type	Either reserve or (natural) beach	-
Dunite mass (Mt)	If volume or mass is known, it is reported, if not NA	Mt
Reference	Reference, for full references go to the "References" tab	-
Latitude	Latitude at which reserve or beach is found	Decimal degree
Longitude	Longitude at which reserve is found	Decimal degree
Comment	Additional information about either the location, purity or volume of reserve	-

## Sheet: Olivine dissolution data
Temp [C°]	pH(initial)	Duration of experiment [hr]	Ionic strength [mol l-1]	Grainsize min [um]	Grainsize max [um]	BET method	Initial SSA [m2 g-1]	Stir speed min [RPM]	Stir speed max [RPM]	Fo	pCO2 [atm]	Rs	Si/Mg	log r[mol/m2/s]	r [mol/m2/s2]	Surface area type	Reference	UseData	Comment
25	4	NA	NA	105	149	NA	NA	NA	NA	0.92	NA	NA	Si	-7.33	4.67735e-08	GEO	Bailey (1974)	NO	Added organic acids
35	4	NA	NA	105	149	NA	NA	NA	NA	0.92	NA	NA	Mg	-6.77	1.69824e-07	GEO	Bailey (1974)	NO	Added organic acids
45	4	NA	NA	105	149	NA	NA	NA	NA	0.92	NA	NA	Si	-6.82	1.51356e-07	GEO	Bailey (1974)	NO	Added organic acids
55	4	NA	NA	105	149	NA	NA	NA	NA	0.92	NA	NA	Mg	-6.12	7.58578e-07	GEO	Bailey (1974)	NO	Added organic acids
65	4	NA	NA	105	149	NA	NA	NA	NA	0.92	NA	NA	Si	-6.22	6.0256e-07	GEO	Bailey (1974)	NO	Added organic acids
25	1.8	NA	NA	NA	NA	NA	NA	NA	NA	0.93	NA	NA	Si	-7.84	1.44544e-08	BET	Blum and Lasaga (1988)	YES	Surface area normalization not specified, assumed to be BET
25	2.35	NA	NA	NA	NA	NA	NA	NA	NA	0.93	NA	NA	Si	-8.07	8.51138e-09	BET	Blum and Lasaga (1988)	YES	Surface area normalization not specified, assumed to be BET
25	2.89	NA	NA	NA	NA	NA	NA	NA	NA	0.93	NA	NA	Si	-8.2	6.30957e-09	BET	Blum and Lasaga (1988)	YES	Surface area normalization not specified, assumed to be BET
25	3.04	NA	NA	NA	NA	NA	NA	NA	NA	0.93	NA	NA	Si	-8.13	7.4131e-09	BET	Blum and Lasaga (1988)	YES	Surface area normalization not specified, assumed to be BET
25	3.38	NA	NA	NA	NA	NA	NA	NA	NA	0.93	NA	NA	Si	-8.49	3.23594e-09	BET	Blum and Lasaga (1988)	YES	Surface area normalization not specified, assumed to be BET
25	3.7	NA	NA	NA	NA	NA	NA	NA	NA	0.93	NA	NA	Si	-8.57	2.69153e-09	BET	Blum and Lasaga (1988)	YES	Surface area normalization not specified, assumed to be BET
25	4.08	NA	NA	NA	NA	NA	NA	NA	NA	0.93	NA	NA	Si	-8.21	6.16595e-09	BET	Blum and Lasaga (1988)	YES	Surface area normalization not specified, assumed to be BET
25	4.38	NA	NA	NA	NA	NA	NA	NA	NA	0.93	NA	NA	Si	-8.71	1.94984e-09	BET	Blum and Lasaga (1988)	YES	Surface area normalization not specified, assumed to be BET
25	4.41	NA	NA	NA	NA	NA	NA	NA	NA	0.93	NA	NA	Si	-9.33	4.67735e-10	BET	Blum and Lasaga (1988)	YES	Surface area normalization not specified, assumed to be BET
25	4.73	NA	NA	NA	NA	NA	NA	NA	NA	0.93	NA	NA	Si	-9.19	6.45654e-10	BET	Blum and Lasaga (1988)	YES	Surface area normalization not specified, assumed to be BET
25	8.78	NA	NA	NA	NA	NA	NA	NA	NA	0.93	NA	NA	Si	-9.22	6.0256e-10	BET	Blum and Lasaga (1988)	NO	Surface area normalization not specified, assumed to be BET
25	8.93	NA	NA	NA	NA	NA	NA	NA	NA	0.93	NA	NA	Si	-9.8	1.58489e-10	BET	Blum and Lasaga (1988)	NO	Surface area normalization not specified, assumed to be BET
25	8.97	NA	NA	NA	NA	NA	NA	NA	NA	0.93	NA	NA	Si	-9.62	2.39883e-10	BET	Blum and Lasaga (1988)	NO	Surface area normalization not specified, assumed to be BET
25	9.46	NA	NA	NA	NA	NA	NA	NA	NA	0.93	NA	NA	Si	-10.45	3.54813e-11	BET	Blum and Lasaga (1988)	NO	Surface area normalization not specified, assumed to be BET
25	11.02	NA	NA	NA	NA	NA	NA	NA	NA	0.93	NA	NA	Si	-10.01	9.77237e-11	BET	Blum and Lasaga (1988)	NO	Surface area normalization not specified, assumed to be BET
25	11.35	NA	NA	NA	NA	NA	NA	NA	NA	0.93	NA	NA	Si	-9.84	1.44544e-10	BET	Blum and Lasaga (1988)	NO	Surface area normalization not specified, assumed to be BET
65	4	5	NA	75	150	Kr	0.034	200	350	0.91	NA	2.06735	Si	-7.60206	2.5e-08	BET	Chen and Brantley (2000)	YES
65	2.95	5	NA	75	150	Kr	0.034	200	350	0.91	NA	2.06735	Si	-6.75945	1.74e-07	BET	Chen and Brantley (2000)	YES
65	2	5	NA	75	150	Kr	0.034	200	350	0.91	NA	2.06735	Si	-6.09205	8.09e-07	BET	Chen and Brantley (2000)	YES
65	5	5	NA	75	150	Kr	0.034	200	350	0.91	NA	2.06735	Si	-7.92082	1.2e-08	BET	Chen and Brantley (2000)	YES
65	2.95	5	NA	75	150	Kr	0.034	200	350	0.91	NA	2.06735	Si	-6.83268	1.47e-07	BET	Chen and Brantley (2000)	MARK	Al added
65	2.95	5	NA	75	150	Kr	0.034	200	350	0.91	NA	2.06735	Si	-6.84771	1.42e-07	BET	Chen and Brantley (2000)	MARK	Al added
65	2.95	5	NA	75	150	Kr	0.034	200	350	0.91	NA	2.06735	Si	-6.81531	1.53e-07	BET	Chen and Brantley (2000)	MARK	Al added
65	2.95	5	NA	75	150	Kr	0.034	200	350	0.91	NA	2.06735	Si	-6.68194	2.08e-07	BET	Chen and Brantley (2000)	YES
25	1.98	40	0.01	50	100	Kr	0.107	NA	NA	1	NA	4.20782	Si	-7.92	1.20226e-08	BET	Golubev et al. (2005)	YES
25	2.28	40	0.01	50	100	Kr	0.107	NA	NA	1	NA	4.20782	Si	-7.98	1.04713e-08	BET	Golubev et al. (2005)	YES
25	3.05	40	0.01	50	100	Kr	0.107	NA	NA	1	NA	4.20782	Si	-8.19	6.45654e-09	BET	Golubev et al. (2005)	YES
25	3.71	40	0.01	50	100	Kr	0.107	NA	NA	1	NA	4.20782	Si	-8.37	4.2658e-09	BET	Golubev et al. (2005)	YES
25	3.81	40	0.01	50	100	Kr	0.107	NA	NA	1	NA	4.20782	Si	-8.48	3.31131e-09	BET	Golubev et al. (2005)	YES
25	4.72	40	0.01	50	100	Kr	0.107	NA	NA	1	NA	4.20782	Si	-8.55	2.81838e-09	BET	Golubev et al. (2005)	YES
25	5.25	40	0.01	50	100	Kr	0.107	NA	NA	1	NA	4.20782	Si	-8.49	3.23594e-09	BET	Golubev et al. (2005)	YES
25	6	40	0.01	50	100	Kr	0.107	NA	NA	1	NA	4.20782	Si	-8.72	1.90546e-09	BET	Golubev et al. (2005)	YES
25	6.66	40	0.01	50	100	Kr	0.107	NA	NA	1	NA	4.20782	Si	-9.39	4.0738e-10	BET	Golubev et al. (2005)	YES
25	7.2	40	0.01	50	100	Kr	0.107	NA	NA	1	NA	4.20782	Si	-9.64	2.29087e-10	BET	Golubev et al. (2005)	YES
25	8.06	60	0.01	50	100	Kr	0.107	NA	NA	1	NA	4.20782	Si	-9.82	1.51356e-10	BET	Golubev et al. (2005)	YES
25	9.85	60	0.01	50	100	Kr	0.107	NA	NA	1	NA	4.20782	Si	-9.99	1.02329e-10	BET	Golubev et al. (2005)	YES
25	10.5	60	0.01	50	100	Kr	0.107	NA	NA	1	NA	4.20782	Si	-10.37	4.2658e-11	BET	Golubev et al. (2005)	YES
25	6.8	40	0.01	50	100	Kr	0.107	NA	NA	1	NA	4.20782	Si	-9.07	8.51138e-10	BET	Golubev et al. (2005)	YES
25	6.2	40	0.01	50	100	Kr	0.107	NA	NA	1	NA	4.20782	Si	-9.07	8.51138e-10	BET	Golubev et al. (2005)	YES
25	4.16	40	0.01	50	100	Kr	0.107	NA	NA	1	1	4.20782	Si	-8.26	5.49541e-09	BET	Golubev et al. (2005)	YES
25	8.45	60	0.01	50	100	Kr	0.107	NA	NA	1	0.003	4.20782	Si	-9.69	2.04174e-10	BET	Golubev et al. (2005)	YES
25	8.4	60	0.01	50	100	Kr	0.107	NA	NA	1	0.005	4.20782	Si	-9.71	1.94984e-10	BET	Golubev et al. (2005)	YES
25	8.46	60	0.01	50	100	Kr	0.107	NA	NA	1	0.0075	4.20782	Si	-9.71	1.94984e-10	BET	Golubev et al. (2005)	YES
25	8.46	60	0.01	50	100	Kr	0.107	NA	NA	1	0.01	4.20782	Si	-9.71	1.94984e-10	BET	Golubev et al. (2005)	YES
25	9.95	60	0.011	50	100	Kr	0.107	NA	NA	1	0.001	4.20782	Si	-9.74	1.8197e-10	BET	Golubev et al. (2005)	YES
25	10.85	60	0.014	50	100	Kr	0.107	NA	NA	1	0.004	4.20782	Si	-10.07	8.51138e-11	BET	Golubev et al. (2005)	YES
25	11	60	0.017	50	100	Kr	0.107	NA	NA	1	0.007	4.20782	Si	-10.06	8.70964e-11	BET	Golubev et al. (2005)	YES
25	11.1	60	0.02	50	100	Kr	0.107	NA	NA	1	0.01	4.20782	Si	-10.03	9.33254e-11	BET	Golubev et al. (2005)	YES
25	10.5	110	0.01	50	100	Kr	0.059	NA	NA	0.92	0	2.3837	Si	-10.37	4.2658e-11	BET	Golubev et al. (2005)	YES
25	10.65	110	0.01	50	100	Kr	0.059	NA	NA	0.92	0	2.3837	Si	-10.19	6.45654e-11	BET	Golubev et al. (2005)	YES
25	11.85	110	0.02	50	100	Kr	0.059	NA	NA	0.92	0	2.3837	Si	-10.38	4.16869e-11	BET	Golubev et al. (2005)	YES
25	10.75	130	0.01	50	100	Kr	0.059	NA	NA	0.92	0.005	2.3837	Si	-10.38	4.16869e-11	BET	Golubev et al. (2005)	YES
25	10.9	130	0.02	50	100	Kr	0.059	NA	NA	0.92	0.01	2.3837	Si	-10.37	4.2658e-11	BET	Golubev et al. (2005)	YES
25	11.03	130	0.03	50	100	Kr	0.059	NA	NA	0.92	0.015	2.3837	Si	-10.35	4.46684e-11	BET	Golubev et al. (2005)	YES
25	11.1	150	0.04	50	100	Kr	0.059	NA	NA	0.92	0.02	2.3837	Si	-10.3	5.01187e-11	BET	Golubev et al. (2005)	YES
25	11.45	150	0.2	50	100	Kr	0.059	NA	NA	0.92	0.1	2.3837	Si	-10.26	5.49541e-11	BET	Golubev et al. (2005)	YES
46	3.48	NA	NA	74	149	NA	0.93	NA	NA	0.82	NA	57.6768	Si	-9.85	1.41254e-10	BET	Grandstaff (1986)	NO
1	3.48	NA	NA	74	149	NA	0.93	NA	NA	0.82	NA	57.6768	Si	-10.95	1.12202e-11	BET	Grandstaff (1986)	NO
25	3	NA	NA	74	149	NA	0.93	NA	NA	0.82	NA	57.6768	Si	-9.88	1.31826e-10	BET	Grandstaff (1986)	NO
25	3.2	NA	NA	74	149	NA	0.93	NA	NA	0.82	NA	57.6768	Si	-10.1	7.94328e-11	BET	Grandstaff (1986)	NO
25	3.48	NA	NA	74	149	NA	0.93	NA	NA	0.82	NA	57.6768	Si	-10.28	5.24807e-11	BET	Grandstaff (1986)	NO
25	4	NA	NA	74	149	NA	0.93	NA	NA	0.82	NA	57.6768	Si	-10.91	1.23027e-11	BET	Grandstaff (1986)	NO
25	4.5	NA	NA	74	149	NA	0.93	NA	NA	0.82	NA	57.6768	Si	-11.53	2.95121e-12	BET	Grandstaff (1986)	NO
25	5	NA	NA	74	149	NA	0.93	NA	NA	0.82	NA	57.6768	Si	-12.06	8.70964e-13	BET	Grandstaff (1986)	NO
90	3.42	3.5	NA	90	180	N2	0.0797	NA	NA	0.91	NA	5.81533	Si	-5.95861	1.1e-06	BET	Hanchen et al. (2006)	MARK	Citric acid added
90	4.53	5	NA	90	180	N2	0.0797	NA	NA	0.91	NA	5.81533	Si	-6.19382	6.4e-07	BET	Hanchen et al. (2006)	MARK	Citric acid added
90	2.01	11.8	NA	90	180	N2	0.0797	NA	NA	0.91	NA	5.81533	Si	-5.658	2.19786e-06	BET	Hanchen et al. (2006)	YES
90	2.03	11.5	NA	90	180	N2	0.0797	NA	NA	0.91	NA	5.81533	Si	-5.658	2.19786e-06	BET	Hanchen et al. (2006)	YES
90	3.02	10	NA	90	180	N2	0.0797	NA	NA	0.91	NA	5.81533	Si	-6.06	8.70964e-07	BET	Hanchen et al. (2006)	YES
90	3.66	12.5	NA	90	180	N2	0.0797	NA	NA	0.91	NA	5.81533	Si	-6.102	7.90679e-07	BET	Hanchen et al. (2006)	YES
90	4.59	12.5	NA	90	180	N2	0.0797	NA	NA	0.91	NA	5.81533	Si	-6.767	1.71002e-07	BET	Hanchen et al. (2006)	YES
90	5.33	11.8	NA	90	180	N2	0.0797	NA	NA	0.91	NA	5.81533	Si	-7.225	5.95662e-08	BET	Hanchen et al. (2006)	YES
90	6.19	11	NA	90	180	N2	0.0797	NA	NA	0.91	NA	5.81533	Si	-7.79	1.62181e-08	BET	Hanchen et al. (2006)	YES
90	7.62	9.8	NA	90	180	N2	0.0797	NA	NA	0.91	NA	5.81533	Si	-8.133	7.36207e-09	BET	Hanchen et al. (2006)	YES
90	7.84	15	NA	90	180	N2	0.0797	NA	NA	0.91	NA	5.81533	Si	-8.03	9.33254e-09	BET	Hanchen et al. (2006)	YES
90	11.94	14	NA	90	180	N2	0.0797	NA	NA	0.91	NA	5.81533	Si	-8.983	1.03992e-09	BET	Hanchen et al. (2006)	YES
90	12.21	6.8	NA	90	180	N2	0.0797	NA	NA	0.91	NA	5.81533	Si	-8.662	2.17771e-09	BET	Hanchen et al. (2006)	YES
120	2.01	10	NA	90	180	N2	0.0797	NA	NA	0.91	NA	5.81533	Si	-4.987	1.03039e-05	BET	Hanchen et al. (2006)	YES
120	2.02	9.5	NA	90	180	N2	0.0797	NA	NA	0.91	NA	5.81533	Si	-4.951	1.11944e-05	BET	Hanchen et al. (2006)	YES
120	2.02	7	NA	90	180	N2	0.0797	NA	NA	0.91	NA	5.81533	Si	-4.886	1.30017e-05	BET	Hanchen et al. (2006)	YES
120	4.24	3	NA	90	180	N2	0.0797	NA	NA	0.91	NA	5.81533	Si	-6.036	9.2045e-07	BET	Hanchen et al. (2006)	YES
120	5.13	5	NA	90	180	N2	0.0797	NA	NA	0.91	NA	5.81533	Si	-6.398	3.99945e-07	BET	Hanchen et al. (2006)	YES
120	6.31	4	NA	90	180	N2	0.0797	NA	NA	0.91	NA	5.81533	Si	-6.914	1.21899e-07	BET	Hanchen et al. (2006)	YES
120	6.49	4	NA	90	180	N2	0.0797	NA	NA	0.91	NA	5.81533	Si	-6.884	1.30617e-07	BET	Hanchen et al. (2006)	YES
120	8.33	10	NA	90	180	N2	0.0797	NA	NA	0.91	NA	5.81533	Si	-7.796	1.59956e-08	BET	Hanchen et al. (2006)	YES
120	9.44	15	NA	90	180	N2	0.0797	NA	NA	0.91	NA	5.81533	Si	-7.678	2.09894e-08	BET	Hanchen et al. (2006)	YES
120	12.54	5	NA	90	180	N2	0.0797	NA	NA	0.91	NA	5.81533	Si	-8.5	3.16228e-09	BET	Hanchen et al. (2006)	YES
120	2.05	5.8	NA	0	90	N2	0.3598	NA	NA	0.91	NA	NA	Si	-5.12494	7.5e-06	BET	Hanchen et al. (2007)	YES
120	3.03	7.3	NA	0	90	N2	0.3598	NA	NA	0.91	NA	NA	Si	-5.52288	3e-06	BET	Hanchen et al. (2007)	YES
120	3.93	8	NA	0	90	N2	0.3598	NA	NA	0.91	NA	NA	Si	-6.18709	6.5e-07	BET	Hanchen et al. (2007)	YES
120	4.75	5.5	NA	0	90	N2	0.3598	NA	NA	0.91	NA	NA	Si	-6.52288	3e-07	BET	Hanchen et al. (2007)	YES
120	2.01	10	NA	90	180	N2	0.0797	NA	NA	0.91	NA	5.81533	Si	-4.98716	1.03e-05	BET	Hanchen et al. (2007)	YES
120	2.02	9.5	NA	90	180	N2	0.0797	NA	NA	0.91	NA	5.81533	Si	-4.95078	1.12e-05	BET	Hanchen et al. (2007)	YES
120	2.02	7	NA	90	180	N2	0.0797	NA	NA	0.91	NA	5.81533	Si	-4.82391	1.5e-05	BET	Hanchen et al. (2007)	YES
120	4.24	3	NA	90	180	N2	0.0797	NA	NA	0.91	NA	5.81533	Si	-6.02228	9.5e-07	BET	Hanchen et al. (2007)	YES
120	5.13	5	NA	90	180	N2	0.0797	NA	NA	0.91	NA	5.81533	Si	-6.38722	4.1e-07	BET	Hanchen et al. (2007)	YES
120	6.31	4	NA	90	180	N2	0.0797	NA	NA	0.91	NA	5.81533	Si	-6.92082	1.2e-07	BET	Hanchen et al. (2007)	YES
120	6.49	4	NA	90	180	N2	0.0797	NA	NA	0.91	NA	5.81533	Si	-6.88606	1.3e-07	BET	Hanchen et al. (2007)	YES
120	8.33	10	NA	90	180	N2	0.0797	NA	NA	0.91	NA	5.81533	Si	-7.77469	1.68e-08	BET	Hanchen et al. (2007)	YES
120	2.08	8.5	NA	90	180	N2	0.1117	NA	NA	0.91	NA	8.15022	Si	-5.18709	6.5e-06	BET	Hanchen et al. (2007)	YES
120	3.31	6.7	NA	90	180	N2	0.1117	NA	NA	0.91	NA	8.15022	Si	-5.54516	2.85e-06	BET	Hanchen et al. (2007)	YES
120	4.11	8.9	NA	90	180	N2	0.1117	NA	NA	0.91	NA	8.15022	Si	-6.08619	8.2e-07	BET	Hanchen et al. (2007)	YES
120	2.07	10.4	NA	180	355	N2	0.0457	NA	NA	0.91	NA	6.6173	Si	-5.04576	9e-06	BET	Hanchen et al. (2007)	YES
120	3.19	7	NA	180	355	N2	0.0457	NA	NA	0.91	NA	6.6173	Si	-5.52288	3e-06	BET	Hanchen et al. (2007)	YES
120	4.25	9	NA	180	355	N2	0.0457	NA	NA	0.91	NA	6.6173	Si	-6.05061	8.9e-07	BET	Hanchen et al. (2007)	YES
120	4.39	7.5	NA	180	355	N2	0.0457	NA	NA	0.91	NA	6.6173	Si	-6.16115	6.9e-07	BET	Hanchen et al. (2007)	YES
150	2.03	9.2	NA	NA	NA	N2	0.0797	NA	NA	0.91	NA	NA	Si	-4.425	3.75837e-05	BET	Hanchen et al. (2006)	YES
150	2.93	6.7	NA	NA	NA	N2	0.0797	NA	NA	0.91	NA	NA	Si	-4.783	1.64816e-05	BET	Hanchen et al. (2006)	YES
150	3.82	7.2	NA	NA	NA	N2	0.0797	NA	NA	0.91	NA	NA	Si	-5.542	2.87078e-06	BET	Hanchen et al. (2006)	YES
150	4.76	4.1	NA	NA	NA	N2	0.0797	NA	NA	0.91	NA	NA	Si	-5.77	1.69824e-06	BET	Hanchen et al. (2006)	YES
150	5.64	4	NA	NA	NA	N2	0.0797	NA	NA	0.91	NA	NA	Si	-6.201	6.29506e-07	BET	Hanchen et al. (2006)	YES
150	5.72	7	NA	NA	NA	N2	0.0797	NA	NA	0.91	NA	NA	Si	-6.187	6.5013e-07	BET	Hanchen et al. (2006)	YES
150	6.75	8	NA	NA	NA	N2	0.0797	NA	NA	0.91	NA	NA	Si	-6.939	1.1508e-07	BET	Hanchen et al. (2006)	YES
150	7.34	7.9	NA	NA	NA	N2	0.0797	NA	NA	0.91	NA	NA	Si	-6.824	1.49968e-07	BET	Hanchen et al. (2006)	YES
90	3.18	4.5	NA	90	180	N2	0.0797	NA	NA	0.91	177.646	5.81533	Si	-5.82391	1.5e-06	BET	Hanchen et al. (2006)	NO
90	3.25	7.9	NA	90	180	N2	0.0797	NA	NA	0.91	138.169	5.81533	Si	-5.85387	1.4e-06	BET	Hanchen et al. (2006)	NO
90	3.27	7.7	NA	90	180	N2	0.0797	NA	NA	0.91	98.6923	5.81533	Si	-5.79588	1.6e-06	BET	Hanchen et al. (2006)	NO
120	3.34	3.1	NA	90	180	N2	0.0797	NA	NA	0.91	138.169	5.81533	Si	-5.14874	7.1e-06	BET	Hanchen et al. (2006)	NO
120	3.29	6.6	NA	90	180	N2	0.0797	NA	NA	0.91	177.646	5.81533	Si	-5.07058	8.5e-06	BET	Hanchen et al. (2006)	NO
120	3.39	6.3	NA	90	180	N2	0.0797	NA	NA	0.91	98.6923	5.81533	Si	-5.25964	5.5e-06	BET	Hanchen et al. (2006)	NO
120	3.66	3.5	NA	90	180	N2	0.0797	NA	NA	0.91	98.6923	5.81533	Si	-5.40894	3.9e-06	BET	Hanchen et al. (2006)	NO
120	3.84	5.7	NA	90	180	N2	0.0797	NA	NA	0.91	14.8038	5.81533	Si	-5.5376	2.9e-06	BET	Hanchen et al. (2006)	NO
120	4.2	7.4	NA	90	180	N2	0.0797	NA	NA	0.91	98.6923	5.81533	Si	-5.65758	2.2e-06	BET	Hanchen et al. (2006)	NO
120	5.03	6.8	NA	90	180	N2	0.0797	NA	NA	0.91	14.8038	5.81533	Si	-6.22185	6e-07	BET	Hanchen et al. (2006)	NO
120	5.69	11.7	NA	90	180	N2	0.0797	NA	NA	0.91	14.8038	5.81533	Si	-6.69897	2e-07	BET	Hanchen et al. (2006)	NO
120	6.03	6	NA	90	180	N2	0.0797	NA	NA	0.91	14.8038	5.81533	Si	-7.82391	1.5e-08	BET	Hanchen et al. (2006)	NO
120	6.03	3	NA	90	180	N2	0.0797	NA	NA	0.91	14.8038	5.81533	Si	-7.95861	1.1e-08	BET	Hanchen et al. (2006)	NO
150	3.34	7	NA	90	180	N2	0.0797	NA	NA	0.91	98.6923	5.81533	Si	-4.9393	1.15e-05	BET	Hanchen et al. (2006)	NO
150	3.39	6.3	NA	90	180	N2	0.0797	NA	NA	0.91	138.169	5.81533	Si	-5	1e-05	BET	Hanchen et al. (2006)	NO
25	1.66	25	NA	74	149	NA	0.0445	NA	NA	0.91	NA	2.67976	Si	-7.31	4.89779e-08	BET	Luce et al. (1972)	YES	pH was not kept constant over experiment
25	3.18	69	NA	74	149	NA	0.0445	NA	NA	0.91	NA	2.67976	Si	-7.63	2.34423e-08	BET	Luce et al. (1972)	YES	pH was not kept constant over experiment
25	4.99	118	NA	74	149	NA	0.0445	NA	NA	0.91	NA	2.67976	Si	-9.42	3.80189e-10	BET	Luce et al. (1972)	YES	pH was not kept constant over experiment
25	7.02	16	NA	74	149	NA	0.0445	NA	NA	0.91	NA	2.67976	Si	-9.97	1.07152e-10	BET	Luce et al. (1972)	YES	pH was not kept constant over experiment
25	9.58	64	NA	74	149	NA	0.0445	NA	NA	0.91	NA	2.67976	Si	-9.91	1.23027e-10	BET	Luce et al. (1972)	YES	pH was not kept constant over experiment
25	2	NA	NA	50	100	Kr	0.0808	NA	NA	0.89	NA	3.29707	Si	-7.8041	1.57e-08	BET	Oelkers (2001)	YES
25	2	NA	NA	50	100	Kr	0.0808	NA	NA	0.89	NA	3.29707	Si	-7.75449	1.76e-08	BET	Oelkers (2001)	YES
25	2	NA	NA	50	100	Kr	0.0808	NA	NA	0.89	NA	3.29707	Si	-7.91721	1.21e-08	BET	Oelkers (2001)	YES
25	2	NA	NA	50	100	Kr	0.0808	NA	NA	0.89	NA	3.29707	Si	-7.91009	1.23e-08	BET	Oelkers (2001)	YES
25	2	NA	NA	50	100	Kr	0.0808	NA	NA	0.89	NA	3.29707	Si	-7.85078	1.41e-08	BET	Oelkers (2001)	YES
25	2	NA	NA	50	100	Kr	0.0808	NA	NA	0.89	NA	3.29707	Si	-7.80967	1.55e-08	BET	Oelkers (2001)	YES
25	2	NA	NA	50	100	Kr	0.0808	NA	NA	0.89	NA	3.29707	Si	-7.97881	1.05e-08	BET	Oelkers (2001)	YES
25	2	NA	NA	50	100	Kr	0.0808	NA	NA	0.89	NA	3.29707	Si	-7.87615	1.33e-08	BET	Oelkers (2001)	YES
25	2	NA	NA	50	100	Kr	0.0808	NA	NA	0.89	NA	3.29707	Si	-7.87615	1.33e-08	BET	Oelkers (2001)	YES
25	2	NA	NA	50	100	Kr	0.0808	NA	NA	0.89	NA	3.29707	Si	-7.8962	1.27e-08	BET	Oelkers (2001)	YES
25	2	NA	NA	50	100	Kr	0.0808	NA	NA	0.89	NA	3.29707	Si	-7.88941	1.29e-08	BET	Oelkers (2001)	YES
25	2	NA	NA	50	100	Kr	0.0808	NA	NA	0.89	NA	3.29707	Si	-7.91721	1.21e-08	BET	Oelkers (2001)	YES
25	2	NA	NA	50	100	Kr	0.0808	NA	NA	0.89	NA	3.29707	Si	-7.90309	1.25e-08	BET	Oelkers (2001)	YES
25	2	NA	NA	50	100	Kr	0.0808	NA	NA	0.89	NA	3.29707	Si	-7.91009	1.23e-08	BET	Oelkers (2001)	YES
25	2	NA	NA	50	100	Kr	0.0808	NA	NA	0.89	NA	3.29707	Si	-7.8729	1.34e-08	BET	Oelkers (2001)	YES
25	2	NA	NA	50	100	Kr	0.0808	NA	NA	0.89	NA	3.29707	Si	-7.92812	1.18e-08	BET	Oelkers (2001)	YES
25	2	NA	NA	50	100	Kr	0.0808	NA	NA	0.89	NA	3.29707	Si	-7.91364	1.22e-08	BET	Oelkers (2001)	YES
25	2	NA	NA	50	100	Kr	0.0808	NA	NA	0.89	NA	3.29707	Si	-7.93181	1.17e-08	BET	Oelkers (2001)	YES
25	2	NA	NA	50	100	Kr	0.0808	NA	NA	0.89	NA	3.29707	Si	-7.88606	1.3e-08	BET	Oelkers (2001)	YES
25	2	NA	NA	50	100	Kr	0.0808	NA	NA	0.89	NA	3.29707	Si	-7.98716	1.03e-08	BET	Oelkers (2001)	YES
25	2	NA	NA	50	100	Kr	0.0808	NA	NA	0.89	NA	3.29707	Si	-7.88941	1.29e-08	BET	Oelkers (2001)	YES
25	2	NA	NA	50	100	Kr	0.0808	NA	NA	0.89	NA	3.29707	Si	-7.92082	1.2e-08	BET	Oelkers (2001)	YES
35	2	NA	NA	50	100	Kr	0.0808	NA	NA	0.89	NA	3.29707	Si	-7.57675	2.65e-08	BET	Oelkers (2001)	YES
45	2	NA	NA	50	100	Kr	0.0808	NA	NA	0.89	NA	3.29707	Si	-7.02872	9.36e-08	BET	Oelkers (2001)	YES
55	2	NA	NA	50	100	Kr	0.0808	NA	NA	0.89	NA	3.29707	Si	-6.969	1.074e-07	BET	Oelkers (2001)	YES
65	2	NA	NA	50	100	Kr	0.0808	NA	NA	0.89	NA	3.29707	Si	-6.56815	2.703e-07	BET	Oelkers (2001)	YES
25	2	2	0.4356	250	350	NA	NA	NA	NA	0.92	NA	NA	Si	-7.69	2.04174e-08	BET	Olsen et al. (2015)	YES	BET surface area given in manuscript; however BET was calculated from empirical equation of Brantley and Mellott (2000)
25	2	2	1.2321	250	350	NA	NA	NA	NA	0.92	NA	NA	Si	-7.72	1.90546e-08	BET	Olsen et al. (2015)	YES	BET surface area given in manuscript; however BET was calculated from empirical equation of Brantley and Mellott (2000)
25	2	2	3.9601	250	350	NA	NA	NA	NA	0.92	NA	NA	Si	-7.81	1.54882e-08	BET	Olsen et al. (2015)	YES	BET surface area given in manuscript; however BET was calculated from empirical equation of Brantley and Mellott (2000)
25	2	2	11.7649	250	350	NA	NA	NA	NA	0.92	NA	NA	Si	-8.03	9.33254e-09	BET	Olsen et al. (2015)	YES	BET surface area given in manuscript; however BET was calculated from empirical equation of Brantley and Mellott (2000)
25	3.03	2	0.4096	250	350	NA	NA	NA	NA	0.92	NA	NA	Si	-8.15	7.07946e-09	BET	Olsen et al. (2015)	YES	BET surface area given in manuscript; however BET was calculated from empirical equation of Brantley and Mellott (2000)
25	2.96	2	1.21	250	350	NA	NA	NA	NA	0.92	NA	NA	Si	-8.03	9.33254e-09	BET	Olsen et al. (2015)	YES	BET surface area given in manuscript; however BET was calculated from empirical equation of Brantley and Mellott (2000)
25	2.98	2	4	250	350	NA	NA	NA	NA	0.92	NA	NA	Si	-8.19	6.45654e-09	BET	Olsen et al. (2015)	YES	BET surface area given in manuscript; however BET was calculated from empirical equation of Brantley and Mellott (2000)
25	2.99	2	11.9716	250	350	NA	NA	NA	NA	0.92	NA	NA	Si	-8.67	2.13796e-09	BET	Olsen et al. (2015)	YES	BET surface area given in manuscript; however BET was calculated from empirical equation of Brantley and Mellott (2000)
25	3.95	2	0.3969	250	350	NA	NA	NA	NA	0.92	NA	NA	Si	-9.05	8.91251e-10	BET	Olsen et al. (2015)	YES	BET surface area given in manuscript; however BET was calculated from empirical equation of Brantley and Mellott (2000)
25	4.01	2	1.1881	250	350	NA	NA	NA	NA	0.92	NA	NA	Si	-9.03	9.33254e-10	BET	Olsen et al. (2015)	YES	BET surface area given in manuscript; however BET was calculated from empirical equation of Brantley and Mellott (2000)
25	3.96	2	4	250	350	NA	NA	NA	NA	0.92	NA	NA	Si	-9.05	8.91251e-10	BET	Olsen et al. (2015)	YES	BET surface area given in manuscript; however BET was calculated from empirical equation of Brantley and Mellott (2000)
25	4	2	11.9716	250	350	NA	NA	NA	NA	0.92	NA	NA	Si	-9.08	8.31764e-10	BET	Olsen et al. (2015)	YES	BET surface area given in manuscript; however BET was calculated from empirical equation of Brantley and Mellott (2000)
25	2.04	2	5.9049	250	350	NA	NA	NA	NA	0.92	NA	NA	Si	-7.61	2.45471e-08	BET	Olsen et al. (2015)	YES	BET surface area given in manuscript; however BET was calculated from empirical equation of Brantley and Mellott (2000)
25	4.01	2	5.9049	250	350	NA	NA	NA	NA	0.92	NA	NA	Si	-9.07	8.51138e-10	BET	Olsen et al. (2015)	YES	BET surface area given in manuscript; however BET was calculated from empirical equation of Brantley and Mellott (2000)
25	3.07	2	5.9049	250	350	NA	NA	NA	NA	0.92	NA	NA	Si	-8.43	3.71535e-09	BET	Olsen et al. (2015)	YES	BET surface area given in manuscript; however BET was calculated from empirical equation of Brantley and Mellott (2000)
25	3.03	2	7.6729	250	350	NA	NA	NA	NA	0.92	NA	NA	Si	-8.44	3.63078e-09	BET	Olsen et al. (2015)	YES	BET surface area given in manuscript; however BET was calculated from empirical equation of Brantley and Mellott (2000)
25	3.99	2	7.8961	250	350	NA	NA	NA	NA	0.92	NA	NA	Si	-9.27	5.37032e-10	BET	Olsen et al. (2015)	YES	BET surface area given in manuscript; however BET was calculated from empirical equation of Brantley and Mellott (2000)
25	2.02	2	7.8961	250	350	NA	NA	NA	NA	0.92	NA	NA	Si	-7.65	2.23872e-08	BET	Olsen et al. (2015)	YES	BET surface area given in manuscript; however BET was calculated from empirical equation of Brantley and Mellott (2000)
25	3.99	2	9.7969	250	350	NA	NA	NA	NA	0.92	NA	NA	Si	-9.3	5.01187e-10	BET	Olsen et al. (2015)	YES	BET surface area given in manuscript; however BET was calculated from empirical equation of Brantley and Mellott (2000)
25	3.01	2	9.7969	250	350	NA	NA	NA	NA	0.92	NA	NA	Si	-8.38	4.16869e-09	BET	Olsen et al. (2015)	YES	BET surface area given in manuscript; however BET was calculated from empirical equation of Brantley and Mellott (2000)
25	1.99	2	9.8596	250	350	NA	NA	NA	NA	0.92	NA	NA	Si	-7.66	2.18776e-08	BET	Olsen et al. (2015)	YES	BET surface area given in manuscript; however BET was calculated from empirical equation of Brantley and Mellott (2000)
25	2.01	2	0.3481	250	350	NA	NA	NA	NA	0.92	NA	NA	Si	-7.66	2.18776e-08	BET	Olsen et al. (2015)	YES	BET surface area given in manuscript; however BET was calculated from empirical equation of Brantley and Mellott (2000)
25	2.03	2	0.9216	250	350	NA	NA	NA	NA	0.92	NA	NA	Si	-7.7	1.99526e-08	BET	Olsen et al. (2015)	YES	BET surface area given in manuscript; however BET was calculated from empirical equation of Brantley and Mellott (2000)
25	2.07	2	2.9584	250	350	NA	NA	NA	NA	0.92	NA	NA	Si	-7.83	1.47911e-08	BET	Olsen et al. (2015)	YES	BET surface area given in manuscript; however BET was calculated from empirical equation of Brantley and Mellott (2000)
25	2.96	2	0.3025	250	350	NA	NA	NA	NA	0.92	NA	NA	Si	-8.1	7.94328e-09	BET	Olsen et al. (2015)	YES	BET surface area given in manuscript; however BET was calculated from empirical equation of Brantley and Mellott (2000)
25	3.04	2	0.8836	250	350	NA	NA	NA	NA	0.92	NA	NA	Si	-8.08	8.31764e-09	BET	Olsen et al. (2015)	YES	BET surface area given in manuscript; however BET was calculated from empirical equation of Brantley and Mellott (2000)
25	2.92	2	2.7889	250	350	NA	NA	NA	NA	0.92	NA	NA	Si	-8.15	7.07946e-09	BET	Olsen et al. (2015)	YES	BET surface area given in manuscript; however BET was calculated from empirical equation of Brantley and Mellott (2000)
25	4.09	2	0.3025	250	350	NA	NA	NA	NA	0.92	NA	NA	Si	-8.71	1.94984e-09	BET	Olsen et al. (2015)	YES	BET surface area given in manuscript; however BET was calculated from empirical equation of Brantley and Mellott (2000)
25	4.07	2	0.9025	250	350	NA	NA	NA	NA	0.92	NA	NA	Si	-8.86	1.38038e-09	BET	Olsen et al. (2015)	YES	BET surface area given in manuscript; however BET was calculated from empirical equation of Brantley and Mellott (2000)
25	4.03	2	2.9929	250	350	NA	NA	NA	NA	0.92	NA	NA	Si	-8.8	1.58489e-09	BET	Olsen et al. (2015)	YES	BET surface area given in manuscript; however BET was calculated from empirical equation of Brantley and Mellott (2000)
25	2.01	2	5.8081	250	350	NA	NA	NA	NA	0.92	NA	NA	Si	-8.2	6.30957e-09	BET	Olsen et al. (2015)	YES	BET surface area given in manuscript; however BET was calculated from empirical equation of Brantley and Mellott (2000)
25	4.02	2	5.9536	250	350	NA	NA	NA	NA	0.92	NA	NA	Si	-8.83	1.47911e-09	BET	Olsen et al. (2015)	YES	BET surface area given in manuscript; however BET was calculated from empirical equation of Brantley and Mellott (2000)
25	2.03	2	8.9401	250	350	NA	NA	NA	NA	0.92	NA	NA	Si	-8.21	6.16595e-09	BET	Olsen et al. (2015)	YES	BET surface area given in manuscript; however BET was calculated from empirical equation of Brantley and Mellott (2000)
25	3.03	2	8.9401	250	350	NA	NA	NA	NA	0.92	NA	NA	Si	-8.65	2.23872e-09	BET	Olsen et al. (2015)	YES	BET surface area given in manuscript; however BET was calculated from empirical equation of Brantley and Mellott (2000)
25	3.94	2	8.9401	250	350	NA	NA	NA	NA	0.92	NA	NA	Si	-8.63	2.34423e-09	BET	Olsen et al. (2015)	YES	BET surface area given in manuscript; however BET was calculated from empirical equation of Brantley and Mellott (2000)
25	4	2	0.7396	250	350	NA	NA	NA	NA	0.92	NA	NA	Si	-8.85	1.41254e-09	BET	Olsen et al. (2015)	YES	BET surface area given in manuscript; however BET was calculated from empirical equation of Brantley and Mellott (2000)
25	2.99	2	0.7225	250	350	NA	NA	NA	NA	0.92	NA	NA	Si	-8.84	1.44544e-09	BET	Olsen et al. (2015)	YES	BET surface area given in manuscript; however BET was calculated from empirical equation of Brantley and Mellott (2000)
25	2.03	2	0.7056	250	350	NA	NA	NA	NA	0.92	NA	NA	Si	-7.95	1.12202e-08	BET	Olsen et al. (2015)	YES	BET surface area given in manuscript; however BET was calculated from empirical equation of Brantley and Mellott (2000)
25	3.02	2	1.6641	250	350	NA	NA	NA	NA	0.92	NA	NA	Si	-8.8	1.58489e-09	BET	Olsen et al. (2015)	YES	BET surface area given in manuscript; however BET was calculated from empirical equation of Brantley and Mellott (2000)
25	2.02	2	1.6129	250	350	NA	NA	NA	NA	0.92	NA	NA	Si	-7.98	1.04713e-08	BET	Olsen et al. (2015)	YES	BET surface area given in manuscript; however BET was calculated from empirical equation of Brantley and Mellott (2000)
25	4.03	2	1.6384	250	350	NA	NA	NA	NA	0.92	NA	NA	Si	-9.23	5.88844e-10	BET	Olsen et al. (2015)	YES	BET surface area given in manuscript; however BET was calculated from empirical equation of Brantley and Mellott (2000)
25	4.04	2	0.2704	250	350	NA	NA	NA	NA	0.92	NA	NA	Si	-8.85	1.41254e-09	BET	Olsen et al. (2015)	YES	BET surface area given in manuscript; however BET was calculated from empirical equation of Brantley and Mellott (2000)
25	3.02	2	0.2704	250	350	NA	NA	NA	NA	0.92	NA	NA	Si	-8.64	2.29087e-09	BET	Olsen et al. (2015)	YES	BET surface area given in manuscript; however BET was calculated from empirical equation of Brantley and Mellott (2000)
25	2.01	2	0.2916	250	350	NA	NA	NA	NA	0.92	NA	NA	Si	-8.04	9.12011e-09	BET	Olsen et al. (2015)	YES	BET surface area given in manuscript; however BET was calculated from empirical equation of Brantley and Mellott (2000)
25	2.97	2	0.119	250	350	NA	NA	NA	NA	0.92	NA	NA	Si	-8.61	2.45471e-09	BET	Olsen et al. (2015)	YES	BET surface area given in manuscript; however BET was calculated from empirical equation of Brantley and Mellott (2000)
25	3.02	2	0.313	250	350	NA	NA	NA	NA	0.92	NA	NA	Si	-8.47	3.38844e-09	BET	Olsen et al. (2015)	YES	BET surface area given in manuscript; however BET was calculated from empirical equation of Brantley and Mellott (2000)
25	3.02	2	0.61	250	350	NA	NA	NA	NA	0.92	NA	NA	Si	-8.47	3.38844e-09	BET	Olsen et al. (2015)	YES	BET surface area given in manuscript; however BET was calculated from empirical equation of Brantley and Mellott (2000)
25	2.99	2	0.907	250	350	NA	NA	NA	NA	0.92	NA	NA	Si	-8.45	3.54813e-09	BET	Olsen et al. (2015)	YES	BET surface area given in manuscript; however BET was calculated from empirical equation of Brantley and Mellott (2000)
25	2.98	2	1.205	250	350	NA	NA	NA	NA	0.92	NA	NA	Si	-8.4	3.98107e-09	BET	Olsen et al. (2015)	YES	BET surface area given in manuscript; however BET was calculated from empirical equation of Brantley and Mellott (2000)
25	2.95	2	1.502	250	350	NA	NA	NA	NA	0.92	NA	NA	Si	-8.3	5.01187e-09	BET	Olsen et al. (2015)	YES	BET surface area given in manuscript; however BET was calculated from empirical equation of Brantley and Mellott (2000)
25	2.94	2	1.801	250	350	NA	NA	NA	NA	0.92	NA	NA	Si	-8.37	4.2658e-09	BET	Olsen et al. (2015)	YES	BET surface area given in manuscript; however BET was calculated from empirical equation of Brantley and Mellott (2000)
25	2.97	2	2.096	250	350	NA	NA	NA	NA	0.92	NA	NA	Si	-8.5	3.16228e-09	BET	Olsen et al. (2015)	YES	BET surface area given in manuscript; however BET was calculated from empirical equation of Brantley and Mellott (2000)
25	3.05	2	2.387	250	350	NA	NA	NA	NA	0.92	NA	NA	Si	-8.55	2.81838e-09	BET	Olsen et al. (2015)	YES	BET surface area given in manuscript; however BET was calculated from empirical equation of Brantley and Mellott (2000)
25	1.96	2	0.12	250	350	NA	NA	NA	NA	0.92	NA	NA	Si	-8.02	9.54993e-09	BET	Olsen et al. (2015)	YES	BET surface area given in manuscript; however BET was calculated from empirical equation of Brantley and Mellott (2000)
25	1.95	2	0.308	250	350	NA	NA	NA	NA	0.92	NA	NA	Si	-8.02	9.54993e-09	BET	Olsen et al. (2015)	YES	BET surface area given in manuscript; however BET was calculated from empirical equation of Brantley and Mellott (2000)
25	1.96	2	0.609	250	350	NA	NA	NA	NA	0.92	NA	NA	Si	-7.97	1.07152e-08	BET	Olsen et al. (2015)	YES	BET surface area given in manuscript; however BET was calculated from empirical equation of Brantley and Mellott (2000)
25	2	2	0.903	250	350	NA	NA	NA	NA	0.92	NA	NA	Si	-8	1e-08	BET	Olsen et al. (2015)	YES	BET surface area given in manuscript; however BET was calculated from empirical equation of Brantley and Mellott (2000)
25	2.01	2	1.198	250	350	NA	NA	NA	NA	0.92	NA	NA	Si	-7.98	1.04713e-08	BET	Olsen et al. (2015)	YES	BET surface area given in manuscript; however BET was calculated from empirical equation of Brantley and Mellott (2000)
25	2.01	2	1.496	250	350	NA	NA	NA	NA	0.92	NA	NA	Si	-7.94	1.14815e-08	BET	Olsen et al. (2015)	YES	BET surface area given in manuscript; however BET was calculated from empirical equation of Brantley and Mellott (2000)
25	2	2	1.795	250	350	NA	NA	NA	NA	0.92	NA	NA	Si	-7.95	1.12202e-08	BET	Olsen et al. (2015)	YES	BET surface area given in manuscript; however BET was calculated from empirical equation of Brantley and Mellott (2000)
25	2.01	2	2.09	250	350	NA	NA	NA	NA	0.92	NA	NA	Si	-7.89	1.28825e-08	BET	Olsen et al. (2015)	YES	BET surface area given in manuscript; however BET was calculated from empirical equation of Brantley and Mellott (2000)
25	2	2	2.385	250	350	NA	NA	NA	NA	0.92	NA	NA	Si	-7.91	1.23027e-08	BET	Olsen et al. (2015)	YES	BET surface area given in manuscript; however BET was calculated from empirical equation of Brantley and Mellott (2000)
25	3.83	2	0.101	250	350	NA	NA	NA	NA	0.92	NA	NA	Si	-8.7	1.99526e-09	BET	Olsen et al. (2015)	YES	BET surface area given in manuscript; however BET was calculated from empirical equation of Brantley and Mellott (2000)
25	3.91	2	0.301	250	350	NA	NA	NA	NA	0.92	NA	NA	Si	-8.79	1.62181e-09	BET	Olsen et al. (2015)	YES	BET surface area given in manuscript; however BET was calculated from empirical equation of Brantley and Mellott (2000)
25	4.05	2	0.595	250	350	NA	NA	NA	NA	0.92	NA	NA	Si	-8.94	1.14815e-09	BET	Olsen et al. (2015)	YES	BET surface area given in manuscript; however BET was calculated from empirical equation of Brantley and Mellott (2000)
25	3.92	2	0.892	250	350	NA	NA	NA	NA	0.92	NA	NA	Si	-8.94	1.14815e-09	BET	Olsen et al. (2015)	YES	BET surface area given in manuscript; however BET was calculated from empirical equation of Brantley and Mellott (2000)
25	3.87	2	1.189	250	350	NA	NA	NA	NA	0.92	NA	NA	Si	-8.71	1.94984e-09	BET	Olsen et al. (2015)	YES	BET surface area given in manuscript; however BET was calculated from empirical equation of Brantley and Mellott (2000)
25	3.91	2	1.486	250	350	NA	NA	NA	NA	0.92	NA	NA	Si	-9.08	8.31764e-10	BET	Olsen et al. (2015)	YES	BET surface area given in manuscript; however BET was calculated from empirical equation of Brantley and Mellott (2000)
25	4.1	2	2.081	250	350	NA	NA	NA	NA	0.92	NA	NA	Si	-8.94	1.14815e-09	BET	Olsen et al. (2015)	YES	BET surface area given in manuscript; however BET was calculated from empirical equation of Brantley and Mellott (2000)
25	4.04	2	2.376	250	350	NA	NA	NA	NA	0.92	NA	NA	Si	-8.56	2.75423e-09	BET	Olsen et al. (2015)	YES	BET surface area given in manuscript; however BET was calculated from empirical equation of Brantley and Mellott (2000)
25	1	2	0.218	250	350	NA	NA	NA	NA	0.92	NA	NA	Si	-7.54	2.88403e-08	BET	Olsen et al. (2015)	YES	BET surface area given in manuscript; however BET was calculated from empirical equation of Brantley and Mellott (2000)
25	1.02	2	0.406	250	350	NA	NA	NA	NA	0.92	NA	NA	Si	-7.58	2.63027e-08	BET	Olsen et al. (2015)	YES	BET surface area given in manuscript; however BET was calculated from empirical equation of Brantley and Mellott (2000)
25	1.05	2	0.69	250	350	NA	NA	NA	NA	0.92	NA	NA	Si	-7.5	3.16228e-08	BET	Olsen et al. (2015)	YES	BET surface area given in manuscript; however BET was calculated from empirical equation of Brantley and Mellott (2000)
25	1.05	2	0.99	250	350	NA	NA	NA	NA	0.92	NA	NA	Si	-7.41	3.89045e-08	BET	Olsen et al. (2015)	YES	BET surface area given in manuscript; however BET was calculated from empirical equation of Brantley and Mellott (2000)
25	1.04	2	1.291	250	350	NA	NA	NA	NA	0.92	NA	NA	Si	-7.38	4.16869e-08	BET	Olsen et al. (2015)	YES	BET surface area given in manuscript; however BET was calculated from empirical equation of Brantley and Mellott (2000)
25	1.02	2	1.593	250	350	NA	NA	NA	NA	0.92	NA	NA	Si	-7.28	5.24807e-08	BET	Olsen et al. (2015)	YES	BET surface area given in manuscript; however BET was calculated from empirical equation of Brantley and Mellott (2000)
25	1.04	2	1.883	250	350	NA	NA	NA	NA	0.92	NA	NA	Si	-7.31	4.89779e-08	BET	Olsen et al. (2015)	YES	BET surface area given in manuscript; however BET was calculated from empirical equation of Brantley and Mellott (2000)
25	1.05	2	2.167	250	350	NA	NA	NA	NA	0.92	NA	NA	Si	-7.22	6.0256e-08	BET	Olsen et al. (2015)	YES	BET surface area given in manuscript; however BET was calculated from empirical equation of Brantley and Mellott (2000)
25	1.04	2	2.467	250	350	NA	NA	NA	NA	0.92	NA	NA	Si	-7.46	3.46737e-08	BET	Olsen et al. (2015)	YES	BET surface area given in manuscript; however BET was calculated from empirical equation of Brantley and Mellott (2000)
25	1.99	2	11.6964	250	350	NA	NA	NA	NA	0.92	NA	NA	Si	-8.62	2.39883e-09	BET	Olsen et al. (2015)	YES	BET surface area given in manuscript; however BET was calculated from empirical equation of Brantley and Mellott (2000)
25	3.04	2	11.7649	250	350	NA	NA	NA	NA	0.92	NA	NA	Si	-9.22	6.0256e-10	BET	Olsen et al. (2015)	YES	BET surface area given in manuscript; however BET was calculated from empirical equation of Brantley and Mellott (2000)
25	2.96	2	5.9049	250	350	NA	NA	NA	NA	0.92	NA	NA	Si	-9.05	8.91251e-10	BET	Olsen et al. (2015)	YES	BET surface area given in manuscript; however BET was calculated from empirical equation of Brantley and Mellott (2000)
25	6.94	2	0.001	250	350	NA	NA	NA	NA	0.92	NA	NA	Si	-8.6	2.51189e-09	BET	Olsen et al. (2008)	YES	BET surface area given in manuscript; however BET was calculated from empirical equation of Brantley and Mellott (2000)
25	3.8	2	1.784	250	350	NA	NA	NA	NA	0.92	NA	NA	Mg	-8.41	3.89045e-09	BET	Olsen et al. (2008)	YES	BET surface area given in manuscript; however BET was calculated from empirical equation of Brantley and Mellott (2000).
25	1.03	8	0.1	50	100	Kr	0.08	NA	NA	0.91	NA	3.2429	Si	-7.23	5.88844e-08	BET	Pokrovsky and Schott (2000)	YES
25	1.12	20	0.1	50	100	Kr	0.08	NA	NA	0.91	NA	3.2429	Si	-7.28	5.24807e-08	BET	Pokrovsky and Schott (2000)	YES
25	1.11	26	0.1	50	100	Kr	0.08	NA	NA	0.91	NA	3.2429	Si	-7.33	4.67735e-08	BET	Pokrovsky and Schott (2000)	YES
25	2.13	8	0.1	50	100	Kr	0.08	NA	NA	0.91	NA	3.2429	Si	-7.7	1.99526e-08	BET	Pokrovsky and Schott (2000)	YES
25	2.18	16	0.1	50	100	Kr	0.08	NA	NA	0.91	NA	3.2429	Si	-7.71	1.94984e-08	BET	Pokrovsky and Schott (2000)	YES
25	2.21	28	0.1	50	100	Kr	0.08	NA	NA	0.91	NA	3.2429	Si	-7.72	1.90546e-08	BET	Pokrovsky and Schott (2000)	YES
25	2.7	39	0.1	50	100	Kr	0.08	NA	NA	0.91	NA	3.2429	Si	-7.73	1.86209e-08	BET	Pokrovsky and Schott (2000)	YES
25	2.81	42	0.1	50	100	Kr	0.08	NA	NA	0.91	NA	3.2429	Si	-7.82	1.51356e-08	BET	Pokrovsky and Schott (2000)	YES
25	2.82	70	0.1	50	100	Kr	0.08	NA	NA	0.91	NA	3.2429	Si	-7.89	1.28825e-08	BET	Pokrovsky and Schott (2000)	YES
25	2.74	30	0.1	50	100	Kr	0.08	NA	NA	0.91	NA	3.2429	Si	-7.83	1.47911e-08	BET	Pokrovsky and Schott (2000)	YES
25	2.88	26	0.1	50	100	Kr	0.08	NA	NA	0.91	NA	3.2429	Si	-7.9	1.25893e-08	BET	Pokrovsky and Schott (2000)	YES
25	2.89	48	0.1	50	100	Kr	0.08	NA	NA	0.91	NA	3.2429	Si	-7.96	1.09648e-08	BET	Pokrovsky and Schott (2000)	YES
25	2.99	31	0.1	50	100	Kr	0.08	NA	NA	0.91	NA	3.2429	Si	-7.93	1.1749e-08	BET	Pokrovsky and Schott (2000)	YES
25	3.03	36	0.1	50	100	Kr	0.08	NA	NA	0.91	NA	3.2429	Si	-7.97	1.07152e-08	BET	Pokrovsky and Schott (2000)	YES
25	3.08	25	0.1	50	100	Kr	0.08	NA	NA	0.91	NA	3.2429	Si	-8.14	7.24436e-09	BET	Pokrovsky and Schott (2000)	YES
25	3.05	48	0.1	50	100	Kr	0.08	NA	NA	0.91	NA	3.2429	Si	-8.18	6.60693e-09	BET	Pokrovsky and Schott (2000)	YES
25	3.16	66	0.1	50	100	Kr	0.08	NA	NA	0.91	NA	3.2429	Si	-8.25	5.62341e-09	BET	Pokrovsky and Schott (2000)	YES
25	3.26	75	0.1	50	100	Kr	0.08	NA	NA	0.91	NA	3.2429	Si	-8.34	4.57088e-09	BET	Pokrovsky and Schott (2000)	YES
25	3.05	51	0.1	50	100	Kr	0.08	NA	NA	0.91	NA	3.2429	Si	-8.28	5.24807e-09	BET	Pokrovsky and Schott (2000)	YES
25	4.15	26	0.001	50	100	Kr	0.08	NA	NA	0.91	NA	3.2429	Si	-9.03	9.33254e-10	BET	Pokrovsky and Schott (2000)	YES
25	3.6	31	0.001	50	100	Kr	0.08	NA	NA	0.91	NA	3.2429	Si	-8.8	1.58489e-09	BET	Pokrovsky and Schott (2000)	YES
25	3.34	26	0.001	50	100	Kr	0.08	NA	NA	0.91	NA	3.2429	Si	-8.55	2.81838e-09	BET	Pokrovsky and Schott (2000)	YES
25	2.85	28	0.001	50	100	Kr	0.08	NA	NA	0.91	NA	3.2429	Si	-8.3	5.01187e-09	BET	Pokrovsky and Schott (2000)	YES
25	4.2	35	0.1	50	100	Kr	0.08	NA	NA	0.91	NA	3.2429	Si	-8.69	2.04174e-09	BET	Pokrovsky and Schott (2000)	YES
25	4.41	42	0.1	50	100	Kr	0.08	NA	NA	0.91	NA	3.2429	Si	-8.8	1.58489e-09	BET	Pokrovsky and Schott (2000)	YES
25	4.49	70	0.1	50	100	Kr	0.08	NA	NA	0.91	NA	3.2429	Si	-8.98	1.04713e-09	BET	Pokrovsky and Schott (2000)	YES
25	4.22	30	0.1	50	100	Kr	0.08	NA	NA	0.91	NA	3.2429	Si	-8.78	1.65959e-09	BET	Pokrovsky and Schott (2000)	YES
25	4.77	42	0.1	50	100	Kr	0.08	NA	NA	0.91	NA	3.2429	Si	-8.98	1.04713e-09	BET	Pokrovsky and Schott (2000)	YES
25	4.85	42	0.1	50	100	Kr	0.08	NA	NA	0.91	NA	3.2429	Si	-9.02	9.54993e-10	BET	Pokrovsky and Schott (2000)	YES
25	4.95	70	0.1	50	100	Kr	0.08	NA	NA	0.91	NA	3.2429	Si	-9.15	7.07946e-10	BET	Pokrovsky and Schott (2000)	YES
25	4.55	26	0.1	50	100	Kr	0.08	NA	NA	0.91	NA	3.2429	Si	-9.03	9.33254e-10	BET	Pokrovsky and Schott (2000)	YES
25	6.18	48	0.1	50	100	Kr	0.08	NA	NA	0.91	NA	3.2429	Si	-9.6	2.51189e-10	BET	Pokrovsky and Schott (2000)	YES
25	6.28	66	0.1	50	100	Kr	0.08	NA	NA	0.91	NA	3.2429	Si	-9.72	1.90546e-10	BET	Pokrovsky and Schott (2000)	YES
25	6.13	75	0.1	50	100	Kr	0.08	NA	NA	0.91	NA	3.2429	Si	-9.92	1.20226e-10	BET	Pokrovsky and Schott (2000)	YES
25	7.33	138	0.1	50	100	Kr	0.08	NA	NA	0.91	NA	3.2429	Si	-9.93	1.1749e-10	BET	Pokrovsky and Schott (2000)	YES
25	7.19	270	0.1	50	100	Kr	0.08	NA	NA	0.91	NA	3.2429	Si	-10.11	7.76247e-11	BET	Pokrovsky and Schott (2000)	YES
25	7.21	111	0.1	50	100	Kr	0.08	NA	NA	0.91	NA	3.2429	Si	-10.04	9.12011e-11	BET	Pokrovsky and Schott (2000)	YES
25	7.25	96	0.1	50	100	Kr	0.08	NA	NA	0.91	NA	3.2429	Si	-9.88	1.31826e-10	BET	Pokrovsky and Schott (2000)	YES
25	6.6	30	0.1	50	100	Kr	0.08	NA	NA	0.91	NA	3.2429	Mg	-9.97	1.07152e-10	BET	Pokrovsky and Schott (2000)	YES
25	6.39	56	0.1	50	100	Kr	0.08	NA	NA	0.91	NA	3.2429	Si	-10.04	9.12011e-11	BET	Pokrovsky and Schott (2000)	YES
25	6.37	48	0.1	50	100	Kr	0.08	NA	NA	0.91	NA	3.2429	Si	-10.01	9.77237e-11	BET	Pokrovsky and Schott (2000)	YES
25	6.3	48	0.1	50	100	Kr	0.08	NA	NA	0.91	NA	3.2429	Si	-10.04	9.12011e-11	BET	Pokrovsky and Schott (2000)	YES
25	6.29	47	0.1	50	100	Kr	0.08	NA	NA	0.91	NA	3.2429	Si	-10.05	8.91251e-11	BET	Pokrovsky and Schott (2000)	YES
25	6.29	45	0.1	50	100	Kr	0.08	NA	NA	0.91	NA	3.2429	Si	-10.04	9.12011e-11	BET	Pokrovsky and Schott (2000)	YES
25	6.28	46	0.1	50	100	Kr	0.08	NA	NA	0.91	NA	3.2429	Si	-10.08	8.31764e-11	BET	Pokrovsky and Schott (2000)	YES
25	6.32	48	0.1	50	100	Kr	0.08	NA	NA	0.91	NA	3.2429	Si	-10.07	8.51138e-11	BET	Pokrovsky and Schott (2000)	YES
25	9.3	138	0.1	50	100	Kr	0.08	NA	NA	0.91	NA	3.2429	Si	-10.49	3.23594e-11	BET	Pokrovsky and Schott (2000)	YES
25	7.9	290	0.1	50	100	Kr	0.08	NA	NA	0.91	NA	3.2429	Si	-10.57	2.69153e-11	BET	Pokrovsky and Schott (2000)	YES
25	7.6	112	0.1	50	100	Kr	0.08	NA	NA	0.91	NA	3.2429	Si	-10.47	3.38844e-11	BET	Pokrovsky and Schott (2000)	YES
25	7.98	45	0.1	50	100	Kr	0.08	NA	NA	0.91	NA	3.2429	Si	-10.39	4.0738e-11	BET	Pokrovsky and Schott (2000)	YES
25	10.08	88	0.02	50	100	Kr	0.08	NA	NA	0.91	NA	3.2429	Si	-10.79	1.62181e-11	BET	Pokrovsky and Schott (2000)	YES
25	9.58	126	0.02	50	100	Kr	0.08	NA	NA	0.91	NA	3.2429	Si	-10.54	2.88403e-11	BET	Pokrovsky and Schott (2000)	YES
25	10.76	300	0.1	50	100	Kr	0.08	NA	NA	0.91	NA	3.2429	Si	-10.38	4.16869e-11	BET	Pokrovsky and Schott (2000)	YES
25	10.9	112	0.1	50	100	Kr	0.08	NA	NA	0.91	NA	3.2429	Si	-10.44	3.63078e-11	BET	Pokrovsky and Schott (2000)	YES
25	12.06	230	0.02	50	100	Kr	0.08	NA	NA	0.91	NA	3.2429	Si	-10.85	1.41254e-11	BET	Pokrovsky and Schott (2000)	YES
25	10.9	140	0.1	50	100	Kr	0.08	NA	NA	0.91	NA	3.2429	Si	-10.69	2.04174e-11	BET	Pokrovsky and Schott (2000)	YES
25	10.78	180	0.1	50	100	Kr	0.08	NA	NA	0.91	NA	3.2429	Si	-10.95	1.12202e-11	BET	Pokrovsky and Schott (2000)	YES
25	11.45	120	0.1	50	100	Kr	0.08	NA	NA	0.91	NA	3.2429	Si	-11.19	6.45654e-12	BET	Pokrovsky and Schott (2000)	YES
25	11.42	162	0.1	50	100	Kr	0.08	NA	NA	0.91	NA	3.2429	Si	-11.18	6.60693e-12	BET	Pokrovsky and Schott (2000)	YES
25	11.46	290	0.1	50	100	Kr	0.08	NA	NA	0.91	NA	3.2429	Si	-11.25	5.62341e-12	BET	Pokrovsky and Schott (2000)	YES
25	11.5	250	0.1	50	100	Kr	0.08	NA	NA	0.91	NA	3.2429	Si	-11.02	9.54993e-12	BET	Pokrovsky and Schott (2000)	YES
25	10.95	106	0.1	50	100	Kr	0.08	NA	NA	0.91	NA	3.2429	Si	-10.6	2.51189e-11	BET	Pokrovsky and Schott (2000)	YES
25	10.85	135	0.1	50	100	Kr	0.08	NA	NA	0.91	NA	3.2429	Si	-10.31	4.89779e-11	BET	Pokrovsky and Schott (2000)	YES
25	11.01	106	0.0015	50	100	Kr	0.08	NA	NA	0.91	NA	3.2429	Si	-10.57	2.69153e-11	BET	Pokrovsky and Schott (2000)	YES
25	11.13	135	0.0015	50	100	Kr	0.08	NA	NA	0.91	NA	3.2429	Si	-10.71	1.94984e-11	BET	Pokrovsky and Schott (2000)	YES
25	8.02	106	0.001	50	100	Kr	0.08	NA	NA	0.91	NA	3.2429	Si	-10.13	7.4131e-11	BET	Pokrovsky and Schott (2000)	YES
25	8.13	135	0.001	50	100	Kr	0.08	NA	NA	0.91	NA	3.2429	Si	-10.33	4.67735e-11	BET	Pokrovsky and Schott (2000)	YES
25	5.7	25	0.1	50	100	Kr	0.08	NA	NA	0.91	NA	3.2429	Si	-9.49	3.23594e-10	BET	Pokrovsky and Schott (2000)	YES
25	5.61	51	0.1	50	100	Kr	0.08	NA	NA	0.91	NA	3.2429	Si	-9.79	1.62181e-10	BET	Pokrovsky and Schott (2000)	YES
25	5.4	43	0.012	50	100	Kr	0.08	NA	NA	0.91	0.5	3.2429	Si	-9.31	4.89779e-10	BET	Pokrovsky and Schott (2000)	NO
25	5.44	45	0.012	50	100	Kr	0.08	NA	NA	0.91	0.5	3.2429	Si	-9.47	3.38844e-10	BET	Pokrovsky and Schott (2000)	NO
25	5.47	30	0.012	50	100	Kr	0.08	NA	NA	0.91	0.5	3.2429	Si	-9.57	2.69153e-10	BET	Pokrovsky and Schott (2000)	NO
25	5.44	16	0.012	50	100	Kr	0.08	NA	NA	0.91	0.5	3.2429	Si	-9.47	3.38844e-10	BET	Pokrovsky and Schott (2000)	NO
25	8.38	138	0.1	50	100	Kr	0.08	NA	NA	0.91	0.5	3.2429	Si	-10.18	6.60693e-11	BET	Pokrovsky and Schott (2000)	NO
25	8.55	264	0.1	50	100	Kr	0.08	NA	NA	0.91	0.5	3.2429	Si	-10.42	3.80189e-11	BET	Pokrovsky and Schott (2000)	NO
25	8.5	111	0.1	50	100	Kr	0.08	NA	NA	0.91	0.5	3.2429	Si	-10.33	4.67735e-11	BET	Pokrovsky and Schott (2000)	NO
25	8.53	96	0.1	50	100	Kr	0.08	NA	NA	0.91	0.5	3.2429	Si	-10.17	6.76083e-11	BET	Pokrovsky and Schott (2000)	NO
25	8.68	440	0.1	50	100	Kr	0.08	NA	NA	0.91	0.5	3.2429	Si	-10.46	3.46737e-11	BET	Pokrovsky and Schott (2000)	NO
25	8.55	90	0.1	50	100	Kr	0.08	NA	NA	0.91	0.5	3.2429	Si	-10.4	3.98107e-11	BET	Pokrovsky and Schott (2000)	NO
25	8.63	200	0.1	50	100	Kr	0.08	NA	NA	0.91	0.5	3.2429	Si	-10.44	3.63078e-11	BET	Pokrovsky and Schott (2000)	NO
25	8.71	164	0.1	50	100	Kr	0.08	NA	NA	0.91	0.5	3.2429	Si	-10.6	2.51189e-11	BET	Pokrovsky and Schott (2000)	NO
25	8.92	288	0.1	50	100	Kr	0.08	NA	NA	0.91	0.5	3.2429	Si	-10.8	1.58489e-11	BET	Pokrovsky and Schott (2000)	NO
25	8.8	240	0.1	50	100	Kr	0.08	NA	NA	0.91	0.5	3.2429	Si	-11.02	9.54993e-12	BET	Pokrovsky and Schott (2000)	NO
25	11.15	170	0.1	50	100	Kr	0.08	NA	NA	0.91	0.5	3.2429	Si	-10.57	2.69153e-11	BET	Pokrovsky and Schott (2000)	NO
25	11.11	144	0.1	50	100	Kr	0.08	NA	NA	0.91	0.5	3.2429	Si	-10.56	2.75423e-11	BET	Pokrovsky and Schott (2000)	NO
25	11.1	120	0.1	50	100	Kr	0.08	NA	NA	0.91	0.5	3.2429	Si	-10.65	2.23872e-11	BET	Pokrovsky and Schott (2000)	NO
25	11.12	57	0.1	50	100	Kr	0.08	NA	NA	0.91	0.5	3.2429	Si	-10.52	3.01995e-11	BET	Pokrovsky and Schott (2000)	NO
25	10.24	91	0.02	50	100	Kr	0.08	NA	NA	0.91	NA	3.2429	Si	-10.72	1.90546e-11	BET	Pokrovsky and Schott (2000)	YES
25	11.14	123	0.11	50	100	Kr	0.08	NA	NA	0.91	NA	3.2429	Si	-11.37	4.2658e-12	BET	Pokrovsky and Schott (2000)	YES
25	11.26	123	0.0015	50	100	Kr	0.08	NA	NA	0.91	NA	3.2429	Si	-11.5	3.16228e-12	BET	Pokrovsky and Schott (2000)	YES
25	11.02	123	0.001	50	100	Kr	0.08	NA	NA	0.91	NA	3.2429	Si	-11.67	2.13796e-12	BET	Pokrovsky and Schott (2000)	YES
25	11.21	180	0.01	50	100	Kr	0.08	NA	NA	0.91	NA	3.2429	Si	-10.74	1.8197e-11	BET	Pokrovsky and Schott (2000)	YES
25	11.16	166	0.01	50	100	Kr	0.08	NA	NA	0.91	NA	3.2429	Si	-10.84	1.44544e-11	BET	Pokrovsky and Schott (2000)	YES
25	9.45	58	0.01	50	100	Kr	0.08	NA	NA	0.91	NA	3.2429	Si	-10.47	3.38844e-11	BET	Pokrovsky and Schott (2000)	YES
25	8.65	76	0.01	50	100	Kr	0.08	NA	NA	0.91	NA	3.2429	Si	-10.42	3.80189e-11	BET	Pokrovsky and Schott (2000)	YES
25	8.89	80	0.01	50	100	Kr	0.08	NA	NA	0.91	NA	3.2429	Si	-10.55	2.81838e-11	BET	Pokrovsky and Schott (2000)	YES
25	8.69	72	0.01	50	100	Kr	0.08	NA	NA	0.91	NA	3.2429	Si	-10.62	2.39883e-11	BET	Pokrovsky and Schott (2000)	YES
25	8.74	122	0.01	50	100	Kr	0.08	NA	NA	0.91	NA	3.2429	Si	-10.78	1.65959e-11	BET	Pokrovsky and Schott (2000)	YES
25	10.39	178	0.02	50	100	Kr	0.08	NA	NA	0.91	0.5	3.2429	Mg	-11.04	9.12011e-12	BET	Pokrovsky and Schott (2000)	NO
25	8.46	52	0.1	50	100	Kr	0.08	NA	NA	0.91	0.5	3.2429	Mg	-10.75	1.77828e-11	BET	Pokrovsky and Schott (2000)	NO
25	8.65	69	0.1	50	100	Kr	0.08	NA	NA	0.91	0.5	3.2429	Mg	-10.7	1.99526e-11	BET	Pokrovsky and Schott (2000)	NO
25	11.23	52	0.1	50	100	Kr	0.08	NA	NA	0.91	0.5	3.2429	Mg	-11.35	4.46684e-12	BET	Pokrovsky and Schott (2000)	NO
25	11.25	69	0.1	50	100	Kr	0.08	NA	NA	0.91	0.5	3.2429	Mg	-11.34	4.57088e-12	BET	Pokrovsky and Schott (2000)	NO
25	11.22	164	0.1	50	100	Kr	0.08	NA	NA	0.91	0.5	3.2429	Mg	-11.59	2.5704e-12	BET	Pokrovsky and Schott (2000)	NO
25	11.22	290	0.1	50	100	Kr	0.08	NA	NA	0.91	0.5	3.2429	Mg	-11.68	2.0893e-12	BET	Pokrovsky and Schott (2000)	NO
25	11.23	240	0.1	50	100	Kr	0.08	NA	NA	0.91	0.5	3.2429	Mg	-11.72	1.90546e-12	BET	Pokrovsky and Schott (2000)	NO
120	2.01	10	NA	90	180	NA	0.0797	700	700	0.91	NA	5.81533	Si	-4.98716	1.03e-05	BET	Prigiobbe et al. (2009)	YES
120	2.02	9.5	NA	90	180	NA	0.0797	700	700	0.91	NA	5.81533	Si	-4.95078	1.12e-05	BET	Prigiobbe et al. (2009)	YES
120	2.02	7	NA	90	180	NA	0.0797	700	700	0.91	NA	5.81533	Si	-4.82391	1.5e-05	BET	Prigiobbe et al. (2009)	YES
120	4.24	3	NA	90	180	NA	0.0797	700	700	0.91	NA	5.81533	Si	-6.02228	9.5e-07	BET	Prigiobbe et al. (2009)	YES
120	5.13	5	NA	90	180	NA	0.0797	700	700	0.91	NA	5.81533	Si	-6.38722	4.1e-07	BET	Prigiobbe et al. (2009)	YES
120	6.31	4	NA	90	180	NA	0.0797	700	700	0.91	NA	5.81533	Si	-6.92082	1.2e-07	BET	Prigiobbe et al. (2009)	YES
120	6.49	4	NA	90	180	NA	0.0797	700	700	0.91	NA	5.81533	Si	-6.88606	1.3e-07	BET	Prigiobbe et al. (2009)	YES
120	8.33	10	NA	90	180	NA	0.0797	700	700	0.91	NA	5.81533	Si	-7.77469	1.68e-08	BET	Prigiobbe et al. (2009)	YES
120	3.35	3	NA	90	180	NA	0.0797	700	700	0.91	102.443	5.81533	Si	-5.12901	7.43e-06	BET	Prigiobbe et al. (2009)	YES
120	3.4	7	NA	90	180	NA	0.0797	700	700	0.91	79.4473	5.81533	Si	-5.17718	6.65e-06	BET	Prigiobbe et al. (2009)	YES
120	3.43	6	NA	90	180	NA	0.0797	700	700	0.91	101.554	5.81533	Si	-5.30103	5e-06	BET	Prigiobbe et al. (2009)	YES
120	3.44	7	NA	90	180	NA	0.0797	700	700	0.91	79.4473	5.81533	Si	-5.34679	4.5e-06	BET	Prigiobbe et al. (2009)	YES
120	3.45	6	NA	90	180	NA	0.0797	700	700	0.91	121.589	5.81533	Si	-5.07058	8.5e-06	BET	Prigiobbe et al. (2009)	YES
120	3.83	6	NA	90	180	NA	0.0797	700	700	0.91	19.5411	5.81533	Si	-5.36151	4.35e-06	BET	Prigiobbe et al. (2009)	YES
120	3.87	6	NA	90	180	NA	0.0797	700	700	0.91	79.546	5.81533	Si	-5.5376	2.9e-06	BET	Prigiobbe et al. (2009)	YES
120	3.89	7	NA	90	180	NA	0.0797	700	700	0.91	79.4473	5.81533	Si	-5.64782	2.25e-06	BET	Prigiobbe et al. (2009)	YES
120	4.22	7	NA	90	180	NA	0.0797	700	700	0.91	78.5591	5.81533	Si	-5.77728	1.67e-06	BET	Prigiobbe et al. (2009)	YES
120	4.5	6	NA	90	180	NA	0.0797	700	700	0.91	14.113	5.81533	Si	-6	1e-06	BET	Prigiobbe et al. (2009)	YES
120	4.75	7	NA	90	180	NA	0.0797	700	700	0.91	14.113	5.81533	Si	-6.1549	7e-07	BET	Prigiobbe et al. (2009)	YES
120	5.08	7	NA	90	180	NA	0.0797	700	700	0.91	13.6195	5.81533	Si	-6.22185	6e-07	BET	Prigiobbe et al. (2009)	YES
120	5.08	7	NA	90	180	NA	0.0797	700	700	0.91	13.3235	5.81533	Si	-6.14448	7.17e-07	BET	Prigiobbe et al. (2009)	YES
120	5.42	6	NA	90	180	NA	0.0797	700	700	0.91	13.5208	5.81533	Si	-6.22185	6e-07	BET	Prigiobbe et al. (2009)	YES
120	5.69	12	NA	90	180	NA	0.0797	700	700	0.91	12.4352	5.81533	Si	-6.69897	2e-07	BET	Prigiobbe et al. (2009)	YES
120	5.71	6	NA	90	180	NA	0.0797	700	700	0.91	13.6195	5.81533	Si	-6.42366	3.77e-07	BET	Prigiobbe et al. (2009)	YES
120	5.96	6	NA	90	180	NA	0.0797	700	700	0.91	14.5078	5.81533	Si	-6.95861	1.1e-07	BET	Prigiobbe et al. (2009)	YES
120	6.04	5	NA	90	180	NA	0.0797	700	700	0.91	13.3235	5.81533	Si	-6.70997	1.95e-07	BET	Prigiobbe et al. (2009)	YES
120	6.21	9	NA	90	180	NA	0.0797	700	700	0.91	13.3235	5.81533	Si	-6.82974	1.48e-07	BET	Prigiobbe et al. (2009)	YES
120	6.34	7	NA	90	180	NA	0.0797	700	700	0.91	13.2248	5.81533	Si	-6.80967	1.55e-07	BET	Prigiobbe et al. (2009)	YES
120	6.4	2	NA	90	180	NA	0.0797	700	700	0.91	14.9025	5.81533	Si	-7.15802	6.95e-08	BET	Prigiobbe et al. (2009)	YES
120	6.45	7	NA	90	180	NA	0.0797	700	700	0.91	13.3235	5.81533	Si	-6.99568	1.01e-07	BET	Prigiobbe et al. (2009)	YES
120	6.59	9	NA	90	180	NA	0.0797	700	700	0.91	5.52677	5.81533	Si	-7.23657	5.8e-08	BET	Prigiobbe et al. (2009)	YES
120	6.68	4	NA	90	180	NA	0.0797	700	700	0.91	4.44115	5.81533	Si	-6.9393	1.15e-07	BET	Prigiobbe et al. (2009)	YES
120	6.82	8	NA	90	180	NA	0.0797	700	700	0.91	4.44115	5.81533	Si	-6.92812	1.18e-07	BET	Prigiobbe et al. (2009)	YES
120	6.84	9	NA	90	180	NA	0.0797	700	700	0.91	4.24377	5.81533	Si	-7.14935	7.09e-08	BET	Prigiobbe et al. (2009)	YES
120	7.1	4	NA	90	180	NA	0.0797	700	700	0.91	1.77646	5.81533	Si	-7.28988	5.13e-08	BET	Prigiobbe et al. (2009)	YES
120	7.81	5	NA	90	180	NA	0.0797	700	700	0.91	0.394769	5.81533	Si	-7.69897	2e-08	BET	Prigiobbe et al. (2009)	YES
120	3.21	6	NA	90	180	NA	0.0797	700	700	0.91	79.546	5.81533	Si	-5.06349	8.64e-06	BET	Prigiobbe et al. (2009)	YES
120	3.45	7	NA	90	180	NA	0.0797	700	700	0.91	78.5591	5.81533	Si	-5.64207	2.28e-06	BET	Prigiobbe et al. (2009)	YES
120	3.64	3	NA	90	180	NA	0.0797	700	700	0.91	79.546	5.81533	Si	-5.43533	3.67e-06	BET	Prigiobbe et al. (2009)	YES
120	4.08	6	NA	90	180	NA	0.0797	700	700	0.91	13.5208	5.81533	Si	-5.27003	5.37e-06	BET	Prigiobbe et al. (2009)	YES
120	4.1	7	NA	90	180	NA	0.0797	700	700	0.91	13.5208	5.81533	Si	-5.77728	1.67e-06	BET	Prigiobbe et al. (2009)	YES
120	4.14	6	NA	90	180	NA	0.0797	700	700	0.91	13.5208	5.81533	Si	-5.46597	3.42e-06	BET	Prigiobbe et al. (2009)	YES
120	4.31	7	NA	90	180	NA	0.0797	700	700	0.91	13.5208	5.81533	Si	-6.12901	7.43e-07	BET	Prigiobbe et al. (2009)	YES
120	4.64	5	NA	90	180	NA	0.0797	700	700	0.91	13.5208	5.81533	Si	-6.05651	8.78e-07	BET	Prigiobbe et al. (2009)	YES
120	4.73	5	NA	90	180	NA	0.0797	700	700	0.91	13.5208	5.81533	Si	-6.04576	9e-07	BET	Prigiobbe et al. (2009)	YES
120	4.8	7	NA	90	180	NA	0.0797	700	700	0.91	4.04638	5.81533	Si	-6.05651	8.78e-07	BET	Prigiobbe et al. (2009)	YES
120	4.85	7	NA	90	180	NA	0.0797	700	700	0.91	4.73723	5.81533	Si	-6.08092	8.3e-07	BET	Prigiobbe et al. (2009)	YES
120	4.9	6	NA	90	180	NA	0.0797	700	700	0.91	4.04638	5.81533	Si	-6.19791	6.34e-07	BET	Prigiobbe et al. (2009)	YES
120	5.4	6	NA	90	180	NA	0.0797	700	700	0.91	14.113	5.81533	Si	-5.9393	1.15e-06	BET	Prigiobbe et al. (2009)	YES
120	5.41	5	NA	90	180	NA	0.0797	700	700	0.91	13.5208	5.81533	Si	-6.97062	1.07e-07	BET	Prigiobbe et al. (2009)	YES
120	5.65	6	NA	90	180	NA	0.0797	700	700	0.91	14.113	5.81533	Si	-6.64207	2.28e-07	BET	Prigiobbe et al. (2009)	YES
120	5.74	5	NA	90	180	NA	0.0797	700	700	0.91	14.113	5.81533	Si	-6.49621	3.19e-07	BET	Prigiobbe et al. (2009)	YES
120	5.76	6	NA	90	180	NA	0.0797	700	700	0.91	13.5208	5.81533	Si	-6.34294	4.54e-07	BET	Prigiobbe et al. (2009)	YES
120	5.96	4	NA	90	180	NA	0.0797	700	700	0.91	13.5208	5.81533	Si	-7.03763	9.17e-08	BET	Prigiobbe et al. (2009)	YES
25	1.81	189.633	NA	250	350	N2	0.0356	NA	NA	0.92	NA	5.92592	Si	-7.82391	1.5e-08	BET	Rosso and Rimstidt (2000)	YES
25	1.86	189.633	NA	250	350	N2	0.0356	NA	NA	0.92	NA	5.92592	Si	-7.85699	1.39e-08	BET	Rosso and Rimstidt (2000)	YES
25	1.77	165.7	NA	250	350	N2	0.0356	NA	NA	0.92	NA	5.92592	Si	-7.87943	1.32e-08	BET	Rosso and Rimstidt (2000)	YES
25	2.77	256.15	NA	250	350	N2	0.0356	NA	NA	0.92	NA	5.92592	Si	-8.26043	5.49e-09	BET	Rosso and Rimstidt (2000)	YES
25	2.74	92.7333	NA	250	350	N2	0.0356	NA	NA	0.92	NA	5.92592	Si	-8.25727	5.53e-09	BET	Rosso and Rimstidt (2000)	YES
25	2.9	92.7333	NA	250	350	N2	0.0356	NA	NA	0.92	NA	5.92592	Si	-8.26043	5.49e-09	BET	Rosso and Rimstidt (2000)	YES
25	3.75	165.55	NA	250	350	N2	0.0356	NA	NA	0.92	NA	5.92592	Si	-8.82681	1.49e-09	BET	Rosso and Rimstidt (2000)	YES
25	3.73	165.55	NA	250	350	N2	0.0356	NA	NA	0.92	NA	5.92592	Si	-8.66354	2.17e-09	BET	Rosso and Rimstidt (2000)	YES
25	3.73	216.633	NA	250	350	N2	0.0356	NA	NA	0.92	NA	5.92592	Mg	-8.5986	2.52e-09	BET	Rosso and Rimstidt (2000)	YES
35	1.79	186.117	NA	250	350	N2	0.0356	NA	NA	0.92	NA	5.92592	Si	-7.64016	2.29e-08	BET	Rosso and Rimstidt (2000)	YES
35	1.82	186.117	NA	250	350	N2	0.0356	NA	NA	0.92	NA	5.92592	Si	-7.70553	1.97e-08	BET	Rosso and Rimstidt (2000)	YES
35	1.89	165.317	NA	250	350	N2	0.0356	NA	NA	0.92	NA	5.92592	Si	-7.68825	2.05e-08	BET	Rosso and Rimstidt (2000)	YES
35	1.91	165.317	NA	250	350	N2	0.0356	NA	NA	0.92	NA	5.92592	Si	-7.66154	2.18e-08	BET	Rosso and Rimstidt (2000)	YES
35	2.83	218.133	NA	250	350	N2	0.0356	NA	NA	0.92	NA	5.92592	Si	-8.14448	7.17e-09	BET	Rosso and Rimstidt (2000)	YES
35	2.8	218.25	NA	250	350	N2	0.0356	NA	NA	0.92	NA	5.92592	Si	-8.04915	8.93e-09	BET	Rosso and Rimstidt (2000)	YES
35	2.78	186.55	NA	250	350	N2	0.0356	NA	NA	0.92	NA	5.92592	Si	-8.14086	7.23e-09	BET	Rosso and Rimstidt (2000)	YES
35	3.98	186.55	NA	250	350	N2	0.0356	NA	NA	0.92	NA	5.92592	Si	-8.6216	2.39e-09	BET	Rosso and Rimstidt (2000)	YES
35	3.88	257.85	NA	250	350	N2	0.0356	NA	NA	0.92	NA	5.92592	Si	-8.60555	2.48e-09	BET	Rosso and Rimstidt (2000)	YES
35	3.86	332.667	NA	250	350	N2	0.0356	NA	NA	0.92	NA	5.92592	Mg	-8.40012	3.98e-09	BET	Rosso and Rimstidt (2000)	YES
45	1.82	310.517	NA	250	350	N2	0.0356	NA	NA	0.92	NA	5.92592	Si	-7.39794	4e-08	BET	Rosso and Rimstidt (2000)	YES
45	1.93	310.517	NA	250	350	N2	0.0356	NA	NA	0.92	NA	5.92592	Si	-7.45469	3.51e-08	BET	Rosso and Rimstidt (2000)	YES
45	1.92	331.85	NA	250	350	N2	0.0356	NA	NA	0.92	NA	5.92592	Si	-7.36957	4.27e-08	BET	Rosso and Rimstidt (2000)	YES
45	2.9	331.85	NA	250	350	N2	0.0356	NA	NA	0.92	NA	5.92592	Si	-7.84164	1.44e-08	BET	Rosso and Rimstidt (2000)	YES
45	2.9	425.2	NA	250	350	N2	0.0356	NA	NA	0.92	NA	5.92592	Si	-7.7986	1.59e-08	BET	Rosso and Rimstidt (2000)	YES
45	2.95	306.067	NA	250	350	N2	0.0356	NA	NA	0.92	NA	5.92592	Si	-7.86328	1.37e-08	BET	Rosso and Rimstidt (2000)	YES
45	2.92	164.933	NA	250	350	N2	0.0356	NA	NA	0.92	NA	5.92592	Si	-7.76955	1.7e-08	BET	Rosso and Rimstidt (2000)	YES
45	3.96	354.35	NA	250	350	N2	0.0356	NA	NA	0.92	NA	5.92592	Si	-8.50446	3.13e-09	BET	Rosso and Rimstidt (2000)	YES
45	3.89	287.583	NA	250	350	N2	0.0356	NA	NA	0.92	NA	5.92592	Si	-8.4908	3.23e-09	BET	Rosso and Rimstidt (2000)	YES
25	4.45	1182	0.1	100	200	Kr	0.057	NA	NA	0.92	30	4.6058	Si	-8.42	3.80189e-09	BET	Shirokova et al. (2012)	MARK	Live bacteria added, 0.1 M NaCl solvent
25	4.35	407	0.1	100	200	Kr	0.057	NA	NA	0.92	30	4.6058	Si	-8.45	3.54813e-09	BET	Shirokova et al. (2012)	MARK	Autoclaved baceria added, 0.1 M NaCl solvent
25	4.6	290	0.1	100	200	Kr	0.057	NA	NA	0.92	30	4.6058	Si	-8.42	3.80189e-09	BET	Shirokova et al. (2012)	MARK	Live baceria added, 0.1 M NaCl solvent
25	5.05	688	0.1 M NaCl	100	200	Kr	0.057	NA	NA	0.92	30	4.6058	Si	-8.48	3.31131e-09	BET	Shirokova et al. (2012)	MARK	Autoclaved baceria added, 0.1 M NaCl solvent
25	4.67	688	0.1 M NaCl	100	200	Kr	0.057	NA	NA	0.92	30	4.6058	Si	-8.39	4.0738e-09	BET	Shirokova et al. (2012)	MARK	glutaraldehyde-treated baceria added, 0.1 M NaCl solvent
25	4.35	1589	0.1 M NaCl	100	200	Kr	0.057	NA	NA	0.92	30	4.6058	Si	-8.58	2.63027e-09	BET	Shirokova et al. (2012)	MARK	Live baceria added, 0.1 M NaCl solvent
25	4.25	1589	0.1 M NaCl	100	200	Kr	0.057	NA	NA	0.92	30	4.6058	Si	-8.56	2.75423e-09	BET	Shirokova et al. (2012)	MARK	Inactivated baceria in NaN3 added, 0.1 M NaCl solvent
25	5.08	1029	0.1 M NaCl	100	200	Kr	0.057	NA	NA	0.92	30	4.6058	Si	-8.49	3.23594e-09	BET	Shirokova et al. (2012)	YES	Bacteria absent, 0.1 M NaCl solvent
25	4.57	1029	0.1 M NaCl	100	200	Kr	0.057	NA	NA	0.92	30	4.6058	Si	-8.36	4.36516e-09	BET	Shirokova et al. (2012)	YES	Bacteria absent, 0.1 M NaCl solvent
25	7.8	1720	0.1 M NaCl	100	200	Kr	0.057	NA	NA	0.92	30	4.6058	Si	-9.94	1.14815e-10	BET	Shirokova et al. (2012)	MARK	Live baceria added, no aeriation, 0.1 M NaCl solvent
25	7.5	1720	0.1 M NaCl	100	200	Kr	0.057	NA	NA	0.92	30	4.6058	Si	-9.74	1.8197e-10	BET	Shirokova et al. (2012)	MARK	Live baceria added, aeriation, 0.1 M NaCl solvent
25	7.4	1720	0.1 M NaCl	100	200	Kr	0.057	NA	NA	0.92	30	4.6058	Si	-9.84	1.44544e-10	BET	Shirokova et al. (2012)	MARK	Live baceria added, no aeriation, 0.1 M NaCl solvent
25	6.7	1720	0.1 M NaCl	100	200	Kr	0.057	NA	NA	0.92	30	4.6058	Si	-9.98	1.04713e-10	BET	Shirokova et al. (2012)	MARK	Live baceria added, aeriation, 0.1 M NaCl solvent
25	7.4	1786	0.1 M NaCl	100	200	Kr	0.057	NA	NA	0.92	30	4.6058	Si	-9.75	1.77828e-10	BET	Shirokova et al. (2012)	MARK	Live baceria added, aeriation, 0.1 M NaCl solvent
25	6.7	1786	0.1 M NaCl	100	200	Kr	0.057	NA	NA	0.92	30	4.6058	Si	-9.66	2.18776e-10	BET	Shirokova et al. (2012)	MARK	Live baceria added, aeriation, 0.1 M NaCl solvent
25	6.85	168	0.1 M NaCl + 0.01 M MES	200	500	Kr	0.0366	NA	NA	0.92	NA	6.71157	Si	-10.63	2.34423e-11	BET	Shirokova et al. (2012)	MARK	0.1 M NaCl + 0.01 M MES solvent
25	6.28	336	0.1 M NaCl + 0.01 M MES	200	500	Kr	0.0366	NA	NA	0.92	NA	6.71157	Si	-10.67	2.13796e-11	BET	Shirokova et al. (2012)	MARK	0.1 M NaCl + 0.01 M MES solvent
25	6.2	504	0.1 M NaCl + 0.01 M MES	200	500	Kr	0.0366	NA	NA	0.92	NA	6.71157	Si	-10.65	2.23872e-11	BET	Shirokova et al. (2012)	MARK	0.1 M NaCl + 0.01 M MES solvent
25	6.29	744	0.1 M NaCl + 0.01 M MES	200	500	Kr	0.0366	NA	NA	0.92	NA	6.71157	Si	-9.41	3.89045e-10	BET	Shirokova et al. (2012)	MARK	0.1 M NaCl + 0.01 M MES solvent
25	9.06	144	0.1 M NaCl + 0.01 M NaHCO3	200	500	Kr	0.0366	NA	NA	0.92	NA	6.71157	Si	-10.6	2.51189e-11	BET	Shirokova et al. (2012)	YES	0.1 M NaCl + 0.01 M NaHCO3 solvent
25	9.03	264	0.1 M NaCl + 0.01 M NaHCO3	200	500	Kr	0.0366	NA	NA	0.92	NA	6.71157	Si	-10.59	2.5704e-11	BET	Shirokova et al. (2012)	YES	0.1 M NaCl + 0.01 M NaHCO3 solvent
25	8.9	432	0.1 M NaCl + 0.01 M NaHCO3	200	500	Kr	0.0366	NA	NA	0.92	NA	6.71157	Si	-10.91	1.23027e-11	BET	Shirokova et al. (2012)	YES	0.1 M NaCl + 0.01 M NaHCO3 solvent
25	8.92	768	0.1 M NaCl + 0.01 M NaHCO3	200	500	Kr	0.0366	NA	NA	0.92	NA	6.71157	Si	-10.89	1.28825e-11	BET	Shirokova et al. (2012)	YES	0.1 M NaCl + 0.01 M NaHCO3 solvent
25	6.05	168	0.1 M NaCl + 0.01 M MES	200	500	Kr	0.0366	NA	NA	0.92	NA	6.71157	Si	-10.28	5.24807e-11	BET	Shirokova et al. (2012)	MARK	0.1 M NaCl + 0.01 M MES solvent
25	6.08	264	0.1 M NaCl + 0.01 M MES	200	500	Kr	0.0366	NA	NA	0.92	NA	6.71157	Si	-10.15	7.07946e-11	BET	Shirokova et al. (2012)	MARK	0.1 M NaCl + 0.01 M MES solvent
25	6.1	432	0.1 M NaCl + 0.01 M MES	200	500	Kr	0.0366	NA	NA	0.92	NA	6.71157	Si	-10.09	8.12831e-11	BET	Shirokova et al. (2012)	MARK	0.1 M NaCl + 0.01 M MES solvent
25	6.12	768	0.1 M NaCl + 0.01 M MES	200	500	Kr	0.0366	NA	NA	0.92	NA	6.71157	Si	-9.89	1.28825e-10	BET	Shirokova et al. (2012)	MARK	0.1 M NaCl + 0.01 M MES solvent
25	9.06	168	0.1 M NaCl + 0.01 M NaHCO3	200	500	Kr	0.0366	NA	NA	0.92	NA	6.71157	Si	-10.23	5.88844e-11	BET	Shirokova et al. (2012)	YES	Bacteria absent, 0.1 M NaCl + 0.01 M NaHCO3 solvent
25	9.02	264	0.1 M NaCl + 0.01 M NaHCO3	200	500	Kr	0.0366	NA	NA	0.92	NA	6.71157	Si	-10.48	3.31131e-11	BET	Shirokova et al. (2012)	MARK	Dead bacteria added, 0.1 M NaCl + 0.01 M NaHCO3 solvent
25	8.95	432	0.1 M NaCl + 0.01 M NaHCO3	200	500	Kr	0.0366	NA	NA	0.92	NA	6.71157	Si	-10.45	3.54813e-11	BET	Shirokova et al. (2012)	MARK	Dead bacteria added, 0.1 M NaCl + 0.01 M NaHCO3 solvent
25	8.9	768	0.1 M NaCl + 0.01 M NaHCO3	200	500	Kr	0.0366	NA	NA	0.92	NA	6.71157	Si	-10.59	2.5704e-11	BET	Shirokova et al. (2012)	MARK	Dead bacteria added, 0.1 M NaCl + 0.01 M NaHCO3 solvent
25	8.9	168	0.1 M NaCl + 0.01 M NaHCO3	200	500	Kr	0.0366	NA	NA	0.92	NA	6.71157	Si	-10.11	7.76247e-11	BET	Shirokova et al. (2012)	YES	Dead bacteria added, 0.1 M NaCl + 0.01 M NaHCO3 solvent
25	8.1	336	0.1 M NaCl + 0.01 M NaHCO3	200	500	Kr	0.0366	NA	NA	0.92	NA	6.71157	Si	-9.72	1.90546e-10	BET	Shirokova et al. (2012)	MARK	Dead bacteria 10% nutrient added, 0.1 M NaCl + 0.01 M NaHCO3 solvent
25	8	432	0.1 M NaCl + 0.01 M NaHCO3	200	500	Kr	0.0366	NA	NA	0.92	NA	6.71157	Si	-9.92	1.20226e-10	BET	Shirokova et al. (2012)	MARK	Dead bacteria 18% nutrient added, 0.1 M NaCl + 0.01 M NaHCO3 solvent
25	8.91	1152	0.1 M NaCl + 0.01 M NaHCO3	200	500	Kr	0.0366	NA	NA	0.92	NA	6.71157	Si	-10.04	9.12011e-11	BET	Shirokova et al. (2012)	MARK	no bacteria added, 0.1 M NaN3 added, 0.1 M NaCl + 0.01 M NaHCO3 solvent
25	8.9	168	0.1 M NaCl + 0.01 M NaHCO3	200	500	Kr	0.0366	NA	NA	0.92	NA	6.71157	Si	-9.91	1.23027e-10	BET	Shirokova et al. (2012)	MARK	no bacteria no nutrients added 0.1 M NaCl + 0.01 M NaHCO3 solvent
25	8.67	336	0.1 M NaCl + 0.01 M NaHCO3	200	500	Kr	0.0366	NA	NA	0.92	NA	6.71157	Si	-10.05	8.91251e-11	BET	Shirokova et al. (2012)	MARK	live bacteria no nutrients added, 0.1 M NaCl + 0.01 M NaHCO3 solvent
25	8.1	432	0.1 M NaCl + 0.01 M NaHCO3	200	500	Kr	0.0366	NA	NA	0.92	NA	6.71157	Si	-9.97	1.07152e-10	BET	Shirokova et al. (2012)	MARK	live bacteria no nutrients added, 0.1 M NaCl + 0.01 M NaHCO3 solvent
25	8.9	1152	0.1 M NaCl + 0.01 M NaHCO3	200	500	Kr	0.0366	NA	NA	0.92	NA	6.71157	Si	-10.17	6.76083e-11	BET	Shirokova et al. (2012)	MARK	no bacteria 0.01M NaN3 added, 0.1 M NaCl + 0.01 M NaHCO3 solvent
25	6.5	168	0.1 M NaCl + 0.01 M MES	200	500	Kr	0.0366	NA	NA	0.92	NA	6.71157	Si	-9.56	2.75423e-10	BET	Shirokova et al. (2012)	MARK	no bacteria no nutrients added, 0.1 M NaCl + 0.01 M MES solvent
25	7.4	336	0.1 M NaCl + 0.01 M MES	200	500	Kr	0.0366	NA	NA	0.92	NA	6.71157	Si	-9.94	1.14815e-10	BET	Shirokova et al. (2012)	MARK	live bacteria, 10 % nutrients added, 0.1 M NaCl + 0.01 M MES solvent
25	7.3	432	0.1 M NaCl + 0.01 M MES	200	500	Kr	0.0366	NA	NA	0.92	NA	6.71157	Si	-9.54	2.88403e-10	BET	Shirokova et al. (2012)	MARK	live bacteria, 20 % nutrients added, 0.1 M NaCl + 0.01 M MES solvent
25	8.9	1152	0.1 M NaCl + 0.01 M NaHCO3	200	500	Kr	0.0366	NA	NA	0.92	NA	6.71157	Si	-10.1	7.94328e-11	BET	Shirokova et al. (2012)	MARK	no bacteria, 0.01 M NaN3 added, 0.1 M NaCl + 0.01 M NaHCO3 solvent
25	5.58	168	0.1 M NaCl + 0.01 M MES	200	500	Kr	0.0366	NA	NA	0.92	NA	6.71157	Si	-9.83	1.47911e-10	BET	Shirokova et al. (2012)	MARK	no bacteria, no nutrients added,0.1 M NaCl + 0.01 M MES solvent
25	5.61	336	0.1 M NaCl + 0.01 M MES	200	500	Kr	0.0366	NA	NA	0.92	NA	6.71157	Si	-9.27	5.37032e-10	BET	Shirokova et al. (2012)	MARK	0.1 M NaCl + 0.01 M MES solvent
25	5.8	432	0.1 M NaCl + 0.01 M MES	200	500	Kr	0.0366	NA	NA	0.92	NA	6.71157	Si	-9.03	9.33254e-10	BET	Shirokova et al. (2012)	MARK	0.1 M NaCl + 0.01 M MES solvent
25	5.94	1152	0.1 M NaCl + 0.01 M MES	200	500	Kr	0.0366	NA	NA	0.92	NA	6.71157	Si	-9.84	1.44544e-10	BET	Shirokova et al. (2012)	MARK	0.1 M NaCl + 0.01 M MES solvent
22	4	1557	NA	38	42	NA	1.3	NA	NA	0.84	NA	29.8754	Si	-11.3	5.01187e-12	BET	Siegel and Pfannkuch(1984)	NO
40	1	64	NA	105	125	N2	0.63	NA	NA	0.92	NA	40.4758	Si	-7.10021	7.93947e-08	BET	Van Herk et al. (1989)	NO
50	1	30.5833	NA	105	125	N2	0.63	NA	NA	0.92	NA	40.4758	Si	-6.7218	1.89759e-07	BET	Van Herk et al. (1989)	NO
60	1	16.75	NA	105	125	N2	0.63	NA	NA	0.92	NA	40.4758	Si	-6.44461	3.59247e-07	BET	Van Herk et al. (1989)	NO
70	1	10	NA	105	125	N2	0.63	NA	NA	0.92	NA	40.4758	Si	-6.14222	7.20746e-07	BET	Van Herk et al. (1989)	NO
70	2	24	NA	105	125	N2	0.63	NA	NA	0.92	NA	40.4758	Si	-6.49584	3.19268e-07	BET	Van Herk et al. (1989)	NO
70	3	52.3333	NA	105	125	N2	0.63	NA	NA	0.92	NA	40.4758	Si	-6.99175	1.01918e-07	BET	Van Herk et al. (1989)	NO
40	1	96.3333	NA	105	125	N2	0.63	NA	NA	0.92	NA	40.4758	Si	-7.35901	4.37515e-08	BET	Van Herk et al. (1989)	NO
50	1	46.4167	NA	105	125	N2	0.63	NA	NA	0.92	NA	40.4758	Si	-7.04531	9.00933e-08	BET	Van Herk et al. (1989)	NO
60	1	29.1667	NA	105	125	N2	0.63	NA	NA	0.92	NA	40.4758	Si	-6.79458	1.60479e-07	BET	Van Herk et al. (1989)	NO
70	1	25.5833	NA	105	125	N2	0.63	NA	NA	0.92	NA	40.4758	Si	-6.62206	2.38747e-07	BET	Van Herk et al. (1989)	NO
70	2	50.25	NA	105	125	N2	0.63	NA	NA	0.92	NA	40.4758	Si	-6.97527	1.0586e-07	BET	Van Herk et al. (1989)	NO
70	3	52.5833	NA	105	125	N2	0.63	NA	NA	0.92	NA	40.4758	Si	-7.14562	7.15115e-08	BET	Van Herk et al. (1989)	NO
25	4.1	429	NA	149	250	Kr	0.0598	NA	NA	0.91	0.000316228	6.55842	Si	-9.1	7.94328e-10	BET	Wogelius and Walther (1991)	YES	HCl solvent
25	5.7	576	NA	149	250	Kr	0.0598	NA	NA	0.91	0.000316228	6.55842	Mg	-9.78	1.65959e-10	BET	Wogelius and Walther (1991)	YES
25	12	65	NA	149	250	Kr	0.0598	NA	NA	0.91	0.000316228	6.55842	Mg	-10.36	4.36516e-11	BET	Wogelius and Walther (1991)	YES	KOH solvent
25	10.4	267	NA	149	250	Kr	0.0598	NA	NA	0.91	0.000316228	6.55842	Si	-10.14	7.24436e-11	BET	Wogelius and Walther (1991)	YES	KOH solvent
25	7.4	166	NA	149	250	Kr	0.0598	NA	NA	0.91	0.000316228	6.55842	Si	-9.77	1.69824e-10	BET	Wogelius and Walther (1991)	YES	KOH solvent
25	9.9	142	NA	149	250	Kr	0.0598	NA	NA	0.91	0.000316228	6.55842	Mg	-10.46	3.46737e-11	BET	Wogelius and Walther (1991)	YES	NaOH solvent
25	9.9	238	NA	149	250	Kr	0.0598	NA	NA	0.91	0.000316228	6.55842	Si	-10.47	3.38844e-11	BET	Wogelius and Walther (1991)	YES	NaOH solvent
25	9.9	119	NA	149	250	Kr	0.0598	NA	NA	0.91	0.000316228	6.55842	Si	-10.1	7.94328e-11	BET	Wogelius and Walther (1991)	YES	NaOH solvent
25	3.7	334	NA	149	250	Kr	0.0598	NA	NA	0.91	0.000316228	6.55842	Si	-8.25	5.62341e-09	BET	Wogelius and Walther (1991)	MARK	ASC solvent
25	10.8	165	NA	250	420	Kr	0.0307	NA	NA	1	0.000316228	5.48431	Si	-10.52	3.01995e-11	BET	Wogelius and Walther (1991)	YES	NaOH solvent
25	3	637	NA	250	420	Kr	0.0307	NA	NA	1	0.000316228	5.48431	Si	-8.83	1.47911e-09	BET	Wogelius and Walther (1991)	YES	HCl solvent
25	5	336	NA	149	250	Kr	0.0598	NA	NA	0.91	0.000316228	6.55842	Si	-8.72	1.90546e-09	BET	Wogelius and Walther (1991)	MARK	KHP+NaOH solvent
25	5.7	431	NA	149	250	Kr	0.0598	NA	NA	0.91	0.000316228	6.55842	Si	-10.21	6.16595e-11	BET	Wogelius and Walther (1991)	YES	H2O solvent
25	2	235	NA	149	250	Kr	0.0598	NA	NA	0.91	0.000316228	6.55842	Si	-8.15	7.07946e-09	BET	Wogelius and Walther (1991)	YES	HCl solvent
25	9.1	212	NA	149	250	Kr	0.0598	NA	NA	0.91	0.000316228	6.55842	Si	-10.03	9.33254e-11	BET	Wogelius and Walther (1991)	YES	NaOH solvent
25	3.7	904	NA	149	250	Kr	0.0598	NA	NA	0.91	0.000316228	6.55842	Si	-8.3	5.01187e-09	BET	Wogelius and Walther (1991)	MARK	ASC solvent
25	2.5	500	NA	149	250	Kr	0.0598	NA	NA	0.91	0.000316228	6.55842	Si	-8.17	6.76083e-09	BET	Wogelius and Walther (1991)	MARK	ASC+HCl solvent
25	4.4	144	NA	149	250	Kr	0.0598	NA	NA	0.91	0.000316228	6.55842	Si	-8.22	6.0256e-09	BET	Wogelius and Walther (1991)	MARK	ASC+NaOH solvent
25	3.1	286	NA	149	250	Kr	0.0598	NA	NA	0.91	0.000316228	6.55842	Si	-8.18	6.60693e-09	BET	Wogelius and Walther (1991)	MARK	ASC solvent
25	4	527	NA	149	250	Kr	0.0598	NA	NA	0.91	0.000316228	6.55842	Si	-8.72	1.90546e-09	BET	Wogelius and Walther (1991)	MARK	KHP+HCL solvent
25	3	1263	NA	149	250	Kr	0.0598	NA	NA	0.91	0.000316228	6.55842	Si	-8.49	3.23594e-09	BET	Wogelius and Walther (1991)	MARK	KHP+HCLsolvent
25	3.5	337	NA	250	420	Kr	0.0307	NA	NA	1	0.000316228	5.48431	Si	-8.26	5.49541e-09	BET	Wogelius and Walther (1991)	MARK	ASC solvent
25	3.1	496	NA	250	420	Kr	0.0307	NA	NA	1	0.000316228	5.48431	Si	-8.39	4.0738e-09	BET	Wogelius and Walther (1991)	MARK	ASC solvent
25	5.3	309	NA	149	250	Kr	0.0598	NA	NA	0.91	0.000316228	6.55842	Si	-8.73	1.86209e-09	BET	Wogelius and Walther (1991)	MARK	ASC solvent
25	10.8	1027	NA	149	250	Kr	0.0598	NA	NA	0.91	0.000316228	6.55842	Si	-15.9	1.25893e-16	BET	Wogelius and Walther (1991)	NO	NaBorate/NaOH solvent
25	11.1	438	NA	250	420	Kr	0.0307	NA	NA	1	3.16228e-05	5.48431	Si	-9.19	6.45654e-10	BET	Wogelius and Walther (1991)	NO	NaOH solvent, CO2 effect on pH unknown hence not included
25	12.4	835	NA	149	250	Kr	0.0598	NA	NA	0.91	3.16228e-05	6.55842	Si	-9.5	3.16228e-10	BET	Wogelius and Walther (1991)	NO	NaOH solvent, CO2 effect on pH unknown hence not included
25	4.1	341	NA	149	250	Kr	0.0598	NA	NA	0.91	3.16228e-05	6.55842	Si	-8.05	8.91251e-09	BET	Wogelius and Walther (1991)	NO	KHP+NaOH solvent, CO2 effect on pH unknown hence not included
25	8.1	335	NA	149	250	Kr	0.0598	NA	NA	0.91	3.16228e-05	6.55842	Si	-10.24	5.7544e-11	BET	Wogelius and Walther (1991)	NO	NaBorate/HCl solvent, CO2 effect on pH unknown hence not included
25	10.7	335	NA	149	250	Kr	0.0598	NA	NA	0.91	3.16228e-05	6.55842	Mg	-9.38	4.16869e-10	BET	Wogelius and Walther (1991)	NO	NaBorate/NaOH solvent, CO2 effect on pH unknown hence not included
25	10.3	317	NA	149	250	Kr	0.0598	NA	NA	0.91	3.16228e-05	6.55842	Si	-9.62	2.39883e-10	BET	Wogelius and Walther (1991)	NO	NaBorate/NaOH solvent, CO2 effect on pH unknown hence not included
25	9.3	316	NA	149	250	Kr	0.0598	NA	NA	0.91	3.16228e-05	6.55842	Mg	-9.04	9.12011e-10	BET	Wogelius and Walther (1991)	NO	NaBorate/H solvent, CO2 effect on pH unknown hence not included
25	12.2	155	NA	250	420	Kr	0.0307	NA	NA	1	3.16228e-05	5.48431	Si	-8.04	9.12011e-09	BET	Wogelius and Walther (1991)	NO	KCl+NaOH solvent, CO2 effect on pH unknown hence not included
65	6	25.1	NA	250	420	Kr	0.0307	NA	NA	0.91	NA	5.65316	Si	-8.13	7.4131e-09	BET	Wogelius and Walther (1992)	YES
65	1.8	20.1	NA	250	420	Kr	0.0307	NA	NA	0.91	NA	5.65316	Si	-6.29	5.12861e-07	BET	Wogelius and Walther (1992)	YES
30	3.92	174	0.003	125	500	N2	15	NA	NA	0.89	0.986923	2295.3	Si	-9.49385	3.2074e-10	BET	Giammar et al. (2005)	NO	CO2 concentration is max (leaked throughout)
30	3.11	629	0.006	125	500	N2	15	NA	NA	0.89	101.653	2295.3	Si	-8.58916	2.5754e-09	BET	Giammar et al. (2005)	NO	CO2 concentration is max (leaked throughout)
95	4.15	170	0.009	125	500	N2	15	NA	NA	0.89	0.986923	2295.3	Si	-8.90647	1.2403e-09	BET	Giammar et al. (2005)	NO	CO2 concentration is max (leaked throughout)
95	3.22	630	0.018	125	500	N2	15	NA	NA	0.89	95.7316	2295.3	Si	-8.49385	3.2074e-09	BET	Giammar et al. (2005)	NO	CO2 concentration is max (leaked throughout)
95	3.22	335	0.063	125	500	N2	15	NA	NA	0.89	102.64	2295.3	Si	-10.8431	1.4353e-11	BET	Giammar et al. (2005)	NO	CO2 concentration is max (leaked throughout)
6	4.9	NA	NA	NA	NA	NA	NA	NA	NA	NA	NA	NA	Mg	-8.43136	3.7037e-09	GEO	Eriksson (1982)	NO
6	3.55	NA	NA	NA	NA	NA	NA	NA	NA	NA	NA	NA	Mg	-7.64782	2.25e-08	GEO	Eriksson (1982)	NO
6	4.3	NA	NA	NA	NA	NA	NA	NA	NA	NA	NA	NA	Mg	-8.05799	8.75e-09	GEO	Eriksson (1982)	NO
6	5.2	NA	NA	NA	NA	NA	NA	NA	NA	NA	NA	NA	Mg	-8.64782	2.25e-09	GEO	Eriksson (1982)	NO
6	3.7	NA	NA	NA	NA	NA	NA	NA	NA	NA	NA	NA	Mg	-7.66051	2.18519e-08	GEO	Eriksson (1982)	NO
6	4.5	NA	NA	NA	NA	NA	NA	NA	NA	NA	NA	NA	Mg	-8.13033	7.40741e-09	GEO	Eriksson (1982)	NO
6	5.05	NA	NA	NA	NA	NA	NA	NA	NA	NA	NA	NA	Mg	-8.37067	4.25926e-09	GEO	Eriksson (1982)	NO
6	3.55	NA	NA	NA	NA	NA	NA	NA	NA	NA	NA	NA	Mg	-7.90309	1.25e-08	GEO	Eriksson (1982)	NO
6	4.3	NA	NA	NA	NA	NA	NA	NA	NA	NA	NA	NA	Mg	-8.33445	4.62963e-09	GEO	Eriksson (1982)	NO
34	2	NA	0	75	150	N2	5.04	NA	8	0.91	0	306.454	Si	-10.6576	2.2e-11	BET	Hausrath and Brantley (2010)	NO	anoxic
34	2	NA	0.7	75	150	N2	5.04	NA	8	0.91	0	306.454	Mg	-10.6021	2.5e-11	BET	Hausrath and Brantley (2010)	NO	benchtop anoxic
34	0.36	NA	3.35	75	150	N2	5.04	NA	8	0.91	0	306.454	Mg	-10.4949	3.2e-11	BET	Hausrath and Brantley (2010)	NO	benchtop anoxic
22.1	2	NA	0	75	150	N2	5.04	NA	8	0.91	NA	306.454	Mg	-10.5528	2.8e-11	BET	Hausrath and Brantley (2010)	NO	benchtop oxic
22.1	2	NA	0.7	75	150	N2	5.04	NA	8	0.91	NA	306.454	Mg	-10.6198	2.4e-11	BET	Hausrath and Brantley (2010)	NO	benchtop oxic
22.1	0.36	NA	3.35	75	150	N2	5.04	NA	8	0.91	NA	306.454	Mg	-10.6021	2.5e-11	BET	Hausrath and Brantley (2010)	NO	benchtop oxic
5.6	2	NA	0	75	150	N2	5.04	NA	8	0.91	NA	306.454	Mg	-10.5528	2.8e-11	BET	Hausrath and Brantley (2010)	NO	refrigerator
5.6	2	NA	0.7	75	150	N2	5.04	NA	8	0.91	NA	306.454	Mg	-10.5686	2.7e-11	BET	Hausrath and Brantley (2010)	NO	refrigerator
5.6	0.36	NA	3.35	75	150	N2	5.04	NA	8	0.91	NA	306.454	Mg	-10.4318	3.7e-11	BET	Hausrath and Brantley (2010)	NO	refrigerator
-19.4	0.36	NA	3.35	75	150	N2	5.04	NA	8	0.91	NA	306.454	Mg	-11.2596	5.5e-12	BET	Hausrath and Brantley (2010)	NO	freezer
-19.4	1.63	NA	3.35	75	150	N2	5.04	NA	8	0.91	NA	306.454	Mg	-10.4437	3.6e-11	BET	Hausrath and Brantley (2010)	NO	freezer
15	8.2	1680	0.72	84	216	Ar	0.9	0	0	0.93	0.00042	70.2164	Si	-10.9365	1.15741e-11	GEO	Flipkens (2023)	NO	No rotation, calculated from Si release, average, ionic strength calculated using relationship given by Zeebe and Wolf-Gladrow (2001)
15	8.2	1680	0.72	84	216	Ar	0.9	18	18	0.93	0.00042	70.2164	Si	-9.91532	1.21528e-10	GEO	Flipkens (2023)	NO	low rotation, calculated from Si release, average, ionic strength calculated using relationship given by Zeebe and Wolf-Gladrow (2001)
15	8.2	1680	0.72	84	216	Ar	0.9	54	54	0.93	0.00042	70.2164	Si	-9.82257	1.50463e-10	GEO	Flipkens (2023)	NO	high rotation, calculated from Si release, average, ionic strength calculated using relationship given by Zeebe and Wolf-Gladrow (2001)
16.75	8.2	2112	0.72	91	224	N2	0.295	155	155	0.94	0.000485	24.2329	Si	-10.9365	1.15741e-11	BET	Montserrat (2017)	NO	A1 FSW, D10 and D90 used as upper and lower limit of grainsize, pH not reported but very likely = 8.2
17.7	8.2	480	0.72	91	224	N2	0.295	155	155	0.94	0.000444	24.2329	Si	-10.4594	3.47222e-11	BET	Montserrat (2017)	NO	A1 FSW, D10 and D90 used as upper and lower limit of grainsize, pH not reported but very likely = 8.2
17.5	8.2	3288	0.72	91	224	N2	0.295	155	155	0.94	0.000384	24.2329	Si	-10.6355	2.31481e-11	BET	Montserrat (2017)	NO	A1 FSW, D10 and D90 used as upper and lower limit of grainsize, pH not reported but very likely = 8.2
16.75	7.94	3288	0.72	91	224	N2	0.295	155	155	0.94	0.000485	24.2329	Si	-10.6355	2.31481e-11	BET	Montserrat (2017)	NO	A3 ASW D10 and D90 used as upper and lower limit of grainsize
16.75	7.95	3288	0.705	91	224	N2	0.295	155	155	0.94	0.000485	24.2329	Si	-10.4594	3.47222e-11	BET	Montserrat (2017)	NO	A3 ASW-Ca D10 and D90 used as upper and lwer limit of grainsize
16.75	8.01	3288	0.623	91	224	N2	0.295	155	155	0.94	0.000485	24.2329	Si	-9.82257	1.50463e-10	BET	Montserrat (2017)	NO	A3 ASW-CaMg
30	7.5	340	NA	75	175	NA	NA	200	200	0.9	NA	NA	Si	-9.1107	7.75e-10	GEO	Torres (2019)	NO	Use of siderophores
25	6.21	2256	NA	65	125	Kr	0.147	150	150	0.9	NA	7.60462	Si	-11.8447	1.43e-12	BET	Gerrits (2020)	YES	Abiotic, no fungus, pH not kept constant (0.01 change), Iron precipitation occurred
25	5.82	888	NA	65	125	Kr	0.142	150	150	0.9	NA	7.34596	Si	-11.4724	3.37e-12	BET	Gerrits (2020)	YES	Abiotic, no fungus, pH not kept constant (0.20 change), Iron precipitation occurred
25	5.81	864	NA	65	125	Kr	0.142	150	150	0.9	NA	7.34596	Si	-11.5017	3.15e-12	BET	Gerrits (2020)	YES	Abiotic, no fungus, pH not kept constant (0.04 change), Iron precipitation occurred
25	5.9	1008	NA	65	125	Kr	0.11	150	150	0.9	NA	5.69053	Si	-11.4056	3.93e-12	BET	Gerrits (2020)	YES	Abiotic, no fungus, pH not kept constant (0.01 change), Iron precipitation occurred
25	2.79	840	NA	65	125	Kr	0.11	150	150	0.9	NA	5.69053	Si	-9.12494	7.5e-10	BET	Gerrits (2020)	YES	Abiotic, no fungus, pH not kept constant (0.60 change)
25	6.21	2256	NA	65	125	Kr	0.147	150	150	0.9	NA	7.60462	Si	-10.983	1.04e-11	BET	Gerrits (2020)	MARK	Fungus WT
25	6.21	2256	NA	65	125	Kr	0.147	150	150	0.9	NA	7.60462	Si	-11.5686	2.7e-12	BET	Gerrits (2020)	MARK	fungus kppks
25	5.82	888	NA	65	125	Kr	0.142	150	150	0.9	NA	7.34596	Si	-9.92812	1.18e-10	BET	Gerrits (2020)	MARK	Fungus WT
25	5.93	864	NA	65	125	Kr	0.142	150	150	0.9	NA	7.34596	Si	-10.6904	2.04e-11	BET	Gerrits (2020)	MARK	Fungus WT
25	5.9	1008	NA	65	125	Kr	0.11	150	150	0.9	NA	5.69053	Si	-10.7747	1.68e-11	BET	Gerrits (2020)	MARK	Fungus WT
25	5.82	888	NA	65	125	Kr	0.142	150	150	0.9	NA	7.34596	Si	-10.6198	2.4e-11	BET	Gerrits (2020)	MARK	Fungus kppks
25	5.81	864	NA	65	125	Kr	0.142	150	150	0.9	NA	7.34596	Si	-10.6968	2.01e-11	BET	Gerrits (2020)	MARK	Fungus kppks
25	5.9	1008	NA	65	125	Kr	0.11	150	150	0.9	NA	5.69053	Si	-10.9626	1.09e-11	BET	Gerrits (2020)	MARK	fungus kppks
30	7.2	79	NA	150	300	NA	0.01064	120	120	0.88	NA	NA	Si	-8.22185	6e-09	GEO	Lunstrum (2023)	NO	Shewanella oneidensis wildtype
30	7.2	46	NA	150	300	NA	0.01064	120	120	0.88	NA	NA	Si	-8.18709	6.5e-09	GEO	Lunstrum (2023)	NO	Shewanella oneidensis wildtype
30	7.2	53	NA	150	300	NA	0.01064	120	120	0.88	NA	NA	Si	-8.79588	1.6e-09	GEO	Lunstrum (2023)	NO	Shewanella oneidensis + siderophores (1µM) added
30	7.2	79	NA	150	300	NA	0.01064	120	120	0.88	NA	NA	Si	-8.22185	6e-09	GEO	Lunstrum (2023)	NO	Shewanella oneidensis + siderophores (50µM) added
30	7.2	46	NA	150	300	NA	0.01064	120	120	0.88	NA	NA	Si	-8.1549	7e-09	GEO	Lunstrum (2023)	NO	Shewanella oneidensis + siderophores (50µM) added
30	7.2	48	NA	150	300	NA	0.01064	120	120	0.88	NA	NA	Si	-9.284	5.2e-10	GEO	Lunstrum (2023)	NO	siderophores (0.05µM) added
30	7.2	48	NA	150	300	NA	0.01064	120	120	0.88	NA	NA	Si	-9.284	5.2e-10	GEO	Lunstrum (2023)	NO	siderophores (1µM) added
30	7.2	48	NA	150	300	NA	0.01064	120	120	0.88	NA	NA	Si	-9	1e-09	GEO	Lunstrum (2023)	NO	siderophores (50µM) added

## Sheet: Olivine reserve data
Country	Region	Type	Dunite mass (Mt)	Reference	Latitude	Longitude	Comment
Norway	Western Norway	mine	2000	Caserini (2022), Harben and Smith (2006)	62.0295	5.53632
China	east central china	reserve	NA	Su (2016)	34.4559	118.82	Sulu
China	east central china	reserve	NA	Su (2016)	31.25	115	Dabie
China	Qinling	reserve	NA	Su (2016), Liu (2009)	35.133	112.358	Dunite source the size of 20 km2, consisting of 90% Dunite
China	Xixia County	reserve	9	Caserini (2022)	33.307	111.474	Yutian County and Xixia County, 9 Mt for both
South Korea	Gyeonggi-do	reserve	NA	Su (2016)	37.5	127.25
Japan	Hokkaido	mine	100	Caserini (2022)	43.2203	142.863	Horoman hill
Japan	Kyushu	reserve	NA	Su (2016)	33.5088	130.694	Mt Sangun
Japan	Chūgoku	reserve	NA	Su (2016)	34.058	131.804	Tari-Misaka ultramafic complex
Japan	Kantō	reserve	NA	Su (2016)	36.1655	139.006	Sanbagawa metamorphic belt
Sweden	Jämtland	reserve	NA	Su (2016), Gilio (2015), Reuber (1982)	64.7575	14.5288	Seve Nappe Complex, dunite body is only 200 m x 30m
Spain	A Coruña	mine	600	Kremer (2019)	43.3623	-8.41154
Spain	Málaga	reserve	NA	Su (2016), Kremer (2019)	36.7462	-5.16123
Morocco	Tanger-Tetouan-Al Hoceima	reserve	NA	Su (2016), Reuber (1982)	34.95	-4.21667	Beni Bouchaïb, mostly hazburgite, core is made of lherzolites
Morocco	Drâa-Tafilalet Region	reserve	NA	Ahmed (2005)	30.5168	-6.90795	Bou Azzer, heavily serpentized and composed mostly of harzburgite with some dunite
Italy	Piedmont	mine	650	Caserini (2022)	45.0522	7.51539
Austria	Tirol	reserve	NA	Su (2016), Melcher (2002)	46.95	10.1667	Hochnörderer, Alps, mostly hazburgite and serpentinized, uncertain how much dunite
Austria	Styria	reserve	NA	Su (2016), Melcher (2002)	48.7393	15.6269	Pernegg an der Mur, Alps, mostly hazburgite and serpentinized, uncertain how much dunite
Austria	Styria	reserve	NA	Su (2016), Melcher (2002)	46.8534	15.3328	Kraubath an der Mur, Alps, mostly hazburgite and serpentinized, uncertain how much dunite
Austria	Styria	reserve	NA	Su (2016), Melcher (2002)	47.4667	14.25	Hochgrößen, Alps, mostly hazburgite and serpentinized, uncertain how much dunite
Slovenia	Drava	reserve	NA	Su (2016), Kirst (2010), De Hoog (2009)	46.5098	15.4096	Pohorje, Serpentinized hazburgite and dunite
Czechia	Vysočina	reserve	NA	Su (2016), Ackerman (2013), Fiala and Padera (1977)	50.8784	14.3716	Bohemian Massifn mostly other material other than serpentinized dunite
Canada	Omineca Country	reserve	NA	Su (2016), Tommasi (2006)	54.5354	-124.185	Murray ridge, mostly hazburgite, however, the hazburgite is rather olivine pure (70-80% olivine)
India	Tamil Nadu	reserve	121.8	Bhavan (2019)	11.1271	78.6569
India	Karnataka	reserve	31.831	Bhavan (2019)	15.3173	75.7139
India	Jharkhand	reserve	17.242	Bhavan (2019)	23.6102	85.2799
India	Odisha	reserve	12.145	Bhavan (2019)	20.9517	85.0985
India	Nagaland	reserve	4.8	Bhavan (2019)	26.1584	94.5624
Russia	Siberia	reserve	NA	Su (2016)	61.5345	99.2497	Saramta massif (also called Sharyzhalgay complex), mostly hazburgite, limited span (1 km diameter)
Russia	Khabarovsk Krai	reserve	NA	Malitch (2012), Burg (2009), Malitch (2020)	57.5863	134.653	Kondyor massif
Indonesia	South Sulawesi	reserve	NA	Su (2016), Maulana (2015), Sufriadin (2020)	-4.83257	119.712	Bantimalam, mostly hazburgite, or very serpentinized dunite
Venuzuela	Cojedes	reserve	NA	Su (2016)	9.91288	-68.3076	Tinaquillo, uncertain how pure or how much
US	Washington state	reserve	200000	Caserini (2022)	48.7046	-121.987	Twin Sisters Peaks
US	North Carolina	reserve	300	Caserini (2022)	35.7596	-79.0193
Oman	Samail	reserve	NA	Cocomazzi (2020), Braun and Kelemen (2002)	23.2969	57.9731	Wadi Tayin massif, harzburgite with veins of dunite up to 160 m thick
New Zealand	Tasman District	reserve	NA	Jugum (2019)	-41.35	173.367	Dun mountain
Australia	Western Australia	reserve	NA	Grguric (2013)	-26.71	116.4	Agnew-Wiluna belt
Greenland	Sermersooq	reserve	NA	Nutman (2021), Friend (2011)	64.18	-51.74	Isua greenstone belt
Hawaii	Kau	beach	NA	NA	18.9363	-155.646
France	La Réunion	beach	NA	NA	-21.365	55.7636
Germany	Rhineland-Palatinate	reserve	NA	Sundermeyer (2020)	50.2898	7.03102	Eifel
Germany	Rhineland-Palatinate	reserve	NA	Ulianov (2007)	48.1104	-7.66571	KaiserStuhl
Iceland	Northeastern Region	reserve	NA	Thomson and Maclennan (2013)	65.1228	-16.2953	Herðubreiðartögl
Iceland	Northeastern Region	reserve	NA	Thomson and Maclennan (2013)	65.1228	-16.2953	Einstæðingur
Iceland	Northeastern Region	reserve	NA	Thomson and Maclennan (2013)	65.0772	-16.6805	Kistufell
Iceland	Northeastern Region	reserve	NA	Thomson and Maclennan (2013)	65.7708	-16.8819	Gæsafjöll
Iceland	Northeastern Region	reserve	NA	Thomson and Maclennan (2013)	65.8115	-17.0069	Borgarhraun
Iceland	Southern Region	reserve	NA	Thomson and Maclennan (2013)	64.0741	-18.2161	Laki
Iceland	Southern Region	reserve	NA	Thomson and Maclennan (2013)	63.7998	-18.9383	Mælifell
Iceland	Southern Region	reserve	NA	Thomson and Maclennan (2013)	64.1911	-21.0355	Miðfell
Iceland	Western Region	reserve	NA	Thomson and Maclennan (2013)	64.7736	-23.6557	Stapafell
Iceland	Southern Peninsula Region	reserve	NA	Thomson and Maclennan (2013)	63.8212	-22.6264	Háleyjabunga
Iceland	Southern Region	reserve	NA	Thomson and Maclennan (2013)	64.3492	-20.9527	Lágafell
Turkey	Bursa	reserve	NA	Ağrılı (2019)	40.15	29.0208
Turkey	Konya-Antalya-Isparta-Burdur	reserve	NA	Ağrılı (2019)	38.0133	32.6989
Turkey	Muğla	reserve	NA	Ağrılı (2019), Kremer (2019)	37.0303	28.5064
Turkey	Hatay	reserve	NA	Ağrılı (2019)	36.4303	36.1742

## Sheet: References
References	Dataset	Full reference
Bailey (1974)	Olivine dissolution	Bailey, A.: Proceedings of the International Symposium on Water-Rock Interaction (eds. J. Cadek and T. Paces), in: Effects of temperature on the reaction of silicates with aqueous solutions in the low temperature range, Geological Survey Prague, Prague, 375–380, 1976.
Blum and Lasaga (1988)	Olivine dissolution	Blum, A. and Lasaga, A.: Role of surface speciation in the low-temperature dissolution of minerals, Nature, 331, 431–433, https://doi.org/10.1038/331431a0, 1988.
Chen and Brantley (2000)	Olivine dissolution	Chen, Y. and Brantley, S. L.: Dissolution of forsteritic olivine at 65°C and 2, Chem. Geol., 165, 267–281, https://doi.org/10.1016/S0009-2541(99)00177-1, 2000.
Golubev et al. (2005)	Olivine dissolution	Golubev, S. V., Pokrovsky, O. S., and Schott, J.: Experimental determination of the effect of dissolved CO2 on the dissolution kinetics of Mg and Ca silicates at 25 °C, Chem. Geol., 217, 227–238, https://doi.org/10.1016/j.chemgeo.2004.12.011, 2005.
Grandstaff (1986)	Olivine dissolution	Grandstaff, D. E.: The dissolution rate of forsteritic olivine from Hawaiian beach sand, in: Rates of Chemical Weathering of Rocks and Minerals, edited by: Colman, S. M. and Dethier, D. P., Academic Press, 41–57, 1986.
Hanchen et al. (2006)	Olivine dissolution	Hänchen, M., Prigiobbe, V., Storti, G., Seward, T. M., and Mazzotti, M.: Dissolution kinetics of fosteritic olivine at 90–150°C including effects of the presence of CO2, Geochim. Cosmochim. Acta, 70, 4403–4416, https://doi.org/10.1016/j.gca.2006.06.1560, 2006.
Luce et al. (1972)	Olivine dissolution	Luce, R. W., Bartlett, R. W., and Parks, G. A.: Dissolution kinetics of magnesium silicates, Geochim. Cosmochim. Acta, 36, 35–50, https://doi.org/10.1016/0016-7037(72)90119-6, 1972.
Oelkers (2001)	Olivine dissolution	Oelkers, E. H.: An experimental study of forsterite dissolution rates as a function of temperature and aqueous Mg and Si concentrations, Chem. Geol., 175, 485–494, https://doi.org/10.1016/S0009-2541(00)00352-1, 2001.
Olsen et al. (2015)	Olivine dissolution	Olsen, A. A., Hausrath, E. M., and Rimstidt, J. D.: Forsterite dissolution rates in Mg-sulfate-rich Mars-analog brines and implications of the aqueous history of Mars, J. Geophys. Res. Planets, 120, 388–400, https://doi.org/10.1002/2014JE004664, 2015.
Olsen et al. (2008)	Olivine dissolution	Olsen, A. A. and Donald Rimstidt, J.: Oxalate-promoted forsterite dissolution at low pH, Geochim. Cosmochim. Acta, 72, 1758–1766, https://doi.org/10.1016/j.gca.2007.12.026, 2008.
Pokrovsky and Schott (2000)	Olivine dissolution	Pokrovsky, O. S. and Schott, J.: Kinetics and mechanism of forsterite dissolution at 25°C and pH from 1 to 12, Geochim. Cosmochim. Acta, 64, 3313–3325, https://doi.org/10.1016/S0016-7037(00)00434-8, 2000.
Prigiobbe et al. (2009)	Olivine dissolution	Prigiobbe, V., Costa, G., Baciocchi, R., Hänchen, M., and Mazzotti, M.: The effect of CO2 and salinity on olivine dissolution kinetics at 120°C, Chem. Eng. Sci., 64, 3510–3515, https://doi.org/10.1016/j.ces.2009.04.035, 2009.
Rosso and Rimstidt (2000)	Olivine dissolution	Rosso, J. J. and Rimstidt, J. D.: A high resolution study of forsterite dissolution rates, Geochim. Cosmochim. Acta, 64, 797–811, https://doi.org/10.1016/S0016-7037(99)00354-3, 2000.
Shirokova et al. (2012)	Olivine dissolution	Shirokova, L. S., Bénézeth, P., Pokrovsky, O. S., Gerard, E., Ménez, B., and Alfredsson, H.: Effect of the heterotrophic bacterium Pseudomonas reactans on olivine dissolution kinetics and implications for CO2 storage in basalts, Geochim. Cosmochim. Acta, 80, 30–50, https://doi.org/10.1016/j.gca.2011.11.046, 2012.
Siegel and Pfannkuch(1984)	Olivine dissolution	Siegel, D. I. and Pfannkuch, H. O.: Silicate mineral dissolution at pH 4 and near standard temperature and pressure, Geochim. Cosmochim. Acta, 48, 197–201, https://doi.org/10.1016/0016-7037(84)90362-4, 1984.
Van Herk et al. (1989)	Olivine dissolution	Van Herk, J., Pietersen, H. S., and Schuiling, R. D.: Neutralization of industrial waste acids with olivine — The dissolution of forsteritic olivine at 40–70°C, Chem. Geol., 76, 341–352, https://doi.org/10.1016/0009-2541(89)90102-2, 1989.
Wogelius and Walther (1991)	Olivine dissolution	Wogelius, R. A. and Walther, J. V.: Olivine dissolution at 25°C: Effects of pH, CO2, and organic acids, Geochim. Cosmochim. Acta, 55, 943–954, https://doi.org/10.1016/0016-7037(91)90153-V, 1991.
Wogelius and Walther (1992)	Olivine dissolution	Wogelius, R. A. and Walther, J. V.: Olivine dissolution kinetics at near-surface conditions, Chem. Geol., 97, 101–112, https://doi.org/10.1016/0009-2541(92)90138-U, 1992.
Giammar et al. (2005)	Olivine dissolution	Giammar, D. E., Bruant, R. G., and Peters, C. A.: Forsterite dissolution and magnesite precipitation at conditions relevant for deep saline aquifer storage and sequestration of carbon dioxide, Chem. Geol., 217, 257–276, https://doi.org/10.1016/j.chemgeo.2004.12.013, 2005.
Eriksson (1982)	Olivine dissolution	Eriksson, E.: On the rate of dissolution of olivine in aqueous solutions, Vatten, 38, 409–415, 1982.
Hausrath and Brantley (2010)	Olivine dissolution	Hausrath, E. M. and Brantley, S. L.: Basalt and olivine dissolution under cold, salty, and acidic conditions: What can we learn about recent aqueous weathering on Mars?, J. Geophys. Res. Planets, 115, https://doi.org/10.1029/2010JE003610, 2010.
Flipkens (2023)	Olivine dissolution	Flipkens, G., Fuhr, M., Fiers, G., Meysman, F. J. R., Town, R. M., and Blust, R.: Enhanced olivine dissolution in seawater through continuous grain collisions, Geochim. Cosmochim. Acta, 359, 84–99, https://doi.org/10.1016/j.gca.2023.09.002, 2023.
Montserrat (2017)	Olivine dissolution	Montserrat, F., Renforth, P., Hartmann, J., Leermakers, M., Knops, P., and Meysman, F. J. R.: Olivine Dissolution in Seawater: Implications for CO2 Sequestration through Enhanced Weathering in Coastal Environments, Environ. Sci. Technol., 51, 3960–3972, https://doi.org/10.1021/acs.est.6b05942, 2017.
Torres (2019)	Olivine dissolution	Torres, M. A., Dong, S., Nealson, K. H., and West, A. J.: The kinetics of siderophore-mediated olivine dissolution, Geobiology, 17, 401–416, https://doi.org/10.1111/gbi.12332, 2019.
Gerrits (2020)	Olivine dissolution	Gerrits, R., Pokharel, R., Breitenbach, R., Radnik, J., Feldmann, I., Schuessler, J. A., von Blanckenburg, F., Gorbushina, A. A., and Schott, J.: How the rock-inhabiting fungus K. petricola A95 enhances olivine dissolution through attachment, Geochim. Cosmochim. Acta, 282, 76–97, https://doi.org/10.1016/j.gca.2020.05.010, 2020.
Lunstrum (2023)	Olivine dissolution	Lunstrum, A., Van Den Berghe, M., Bian, X., John, S., Nealson, K., and West, A. J.: Bacterial use of siderophores increases olivine dissolution rates by nearly an order of magnitude | Geochemical Perspectives Letters, Geochem. Perspect. Lett., 25, https://doi.org/10.7185/geochemlet.2315, 2023.
Ackerman (2013)	Olivine reserves	Ackerman, L., Pitcher, L., Strnad, L., Puchtel, I. S., Jelínek, E., Walker, R. J., and Rohovec, J.: Highly siderophile element geochemistry of peridotites and pyroxenites from Horní Bory, Bohemian Massif: Implications for HSE behaviour in subduction-related upper mantle, Geochim. Cosmochim. Acta, 100, 158–175, https://doi.org/10.1016/j.gca.2012.09.050, 2013.
Ağrılı (2019)	Olivine reserves	Ağrılı, H.: Magnesite and Olivine Deposits of Turkey, in: Mineral Resources of Turkey, edited by: Pirajno, F., Ünlü, T., Dönmez, C., and Şahin, M. B., Springer International Publishing, Cham, 731–746, https://doi.org/10.1007/978-3-030-02950-0_16, 2019.
Ahmed (2005)	Olivine reserves	Ahmed, A. H., Arai, S., Abdel-Aziz, Y. M., and Rahimi, A.: Spinel composition as a petrogenetic indicator of the mantle section in the Neoproterozoic Bou Azzer ophiolite, Anti-Atlas, Morocco, Precambrian Res., 138, 225–234, https://doi.org/10.1016/j.precamres.2005.05.004, 2005.
Bhavan (2019)	Olivine reserves	Bhavan, I.: Minor Minerals 30.7 Dunite & Pyroxenite, in: Indian Minerals Yearbook 2019 (Part- III : Mineral Reviews) 58th Edition., 2019.
Braun (2002)	Olivine reserves	Braun, M. G. and Kelemen, P. B.: Dunite distribution in the Oman Ophiolite: Implications for melt flux through porous dunite conduits, Geochem. Geophys. Geosystems, 3, 1–21, https://doi.org/10.1029/2001GC000289, 2002.
Burg (2009)	Olivine reserves	Burg, J.-P., Bodinier, J.-L., Gerya, T., Bedini, R.-M., Boudier, F., Dautria, J.-M., Prikhodko, V., Efimov, A., Pupier, E., and Balanec, J.-L.: Translithospheric Mantle Diapirism: Geological Evidence and Numerical Modelling of the Kondyor Zoned Ultramafic Complex (Russian Far-East), J. Petrol., 50, 289–321, https://doi.org/10.1093/petrology/egn083, 2009.
Caserini (2022)	Olivine reserves	Caserini, S., Storni, N., and Grosso, M.: The Availability of Limestone and Other Raw Materials for Ocean Alkalinity Enhancement, Glob. Biogeochem. Cycles, 36, e2021GB007246, https://doi.org/10.1029/2021GB007246, 2022.
Cocomazzi (2020)	Olivine reserves	Cocomazzi, G., Grieco, G., Tartarotti, P., Bussolesi, M., Zaccarini, F., Crispini, L., and Science Team, O. D. P.: The Formation of Dunite Channels within Harzburgite in the Wadi Tayin Massif, Oman Ophiolite: Insights from Compositional Variability of Cr-Spinel and Olivine in Holes BA1B and BA3A, Oman Drilling Project, Minerals, 10, 167, https://doi.org/10.3390/min10020167, 2020.
De Hoog (2009)	Olivine reserves	De Hoog, J. C. M., Janák, M., Vrabec, M., and Froitzheim, N.: Serpentinised peridotites from an ultrahigh-pressure terrane in the Pohorje Mts. (Eastern Alps, Slovenia): Geochemical constraints on petrogenesis and tectonic setting, Lithos, 109, 209–222, https://doi.org/10.1016/j.lithos.2008.05.006, 2009.
Fiala (1977)	Olivine reserves	Fiala, J. and Paděra, K.: The chemistry of the minerals of the pyrope dunite from borehole T-7 near Staré (Bohemia), Tschermaks Mineral. Petrogr. Mitteilungen, 24, 205–219, https://doi.org/10.1007/BF01081128, 1977.
Friend (2011)	Olivine reserves	Friend, C. R. L. and Nutman, A. P.: Dunites from Isua, Greenland: A ca. 3720 Ma window into subcrustal metasomatism of depleted mantle, Geology, 39, 663–666, https://doi.org/10.1130/G31904.1, 2011.
Gilio (2015)	Olivine reserves	Gilio, M., Clos, F., and van Roermund, H. L. M.: The Friningen Garnet Peridotite (central Swedish Caledonides). A good example of the characteristic PTt path of a cold mantle wedge garnet peridotite, Lithos, 230, 1–16, https://doi.org/10.1016/j.lithos.2015.05.003, 2015.
Grguric (2013)	Olivine reserves	Grguric, B. A., Seat, Z., Karpuzov, A. A., and Simonov, O. N.: The West Jordan deposit, a newly-discovered type 2 dunite-hosted nickel sulphide system in the northern Agnew–Wiluna belt, Western Australia, Ore Geol. Rev., 51, 79–92, https://doi.org/10.1016/j.oregeorev.2012.12.003, 2013.
Harben (2006)	Olivine reserves	Harben, P. W. and Smith, C., Jr.: Olivine, in: Industrial minerals & rocks: commodities, markets, and uses, edited by: Kogel, J. E., Trivedi, N. C., Barker, J. M., and Krukowski, S. T., SME, Littleton, Colo., 679–683, 2006.
Jugum (2019)	Olivine reserves	Jugum, D., Stewart, E., Palin, J. M., Mortimer, N., Norris, R. J., and Lamb, W. M.: Chapter 5 Correlations between a heterogeneous mantle and multiple stages of crustal growth: a review of the Dun Mountain ophiolite, New Zealand, Geol. Soc. Lond. Mem., 49, 75–92, https://doi.org/10.1144/M49.3, 2019.
Kirst (2010)	Olivine reserves	Kirst, F., Sandmann, S., Nagel, T., Froitzheim, N., and Janák, M.: Tectonic evolution of the southeastern part of the Pohorje Mountains (Eastern Alps, Slovenia), Geol. Carpathica, 61, 451–461, https://doi.org/10.2478/v10096-010-0027-y, 2010.
Kremer (2019)	Olivine reserves	Kremer, D., Etzold, S., Boldt, J., Blaum, P., Hahn, K. M., Wotruba, H., and Telle, R.: Geological Mapping and Characterization of Possible Primary Input Materials for the Mineral Sequestration of Carbon Dioxide in Europe, Minerals, 9, 485, https://doi.org/10.3390/min9080485, 2019.
Liu (2009)	Olivine reserves	Liu, J., Sun, Y., Tong, L., and Sun, W.: Emplacement age of the Songshugou ultramafic massif in the Qinling orogenic belt, and geologic implications, Int. Geol. Rev., 51, 58–76, https://doi.org/10.1080/00206810802650576, 2009.
Malitch (2012)	Olivine reserves	Malitch, K. N., Efimov, A. A., and Badanina, I. Yu.: The age of Kondyor massif dunites (Aldan Province, Russia): First U-Pb isotopic data, Dokl. Earth Sci., 446, 1054–1058, https://doi.org/10.1134/S1028334X12080053, 2012.
Maulana (2015)	Olivine reserves	Maulana, A., Christy, A. G., and Ellis, D. J.: Petrology, geochemistry and tectonic significance of serpentinized ultramafic rocks from the South Arm of Sulawesi, Indonesia, Geochemistry, 75, 73–87, https://doi.org/10.1016/j.chemer.2014.09.003, 2015.
Melcher (2002)	Olivine reserves	Melcher, F., Meisel, T., Puhl, J., and Koller, F.: Petrogenesis and geotectonic setting of ultramafic rocks in the Eastern Alps: constraints from geochemistry, Lithos, 65, 69–112, https://doi.org/10.1016/S0024-4937(02)00161-5, 2002.
Nutman (2021)	Olivine reserves	Nutman, A. P., Scicchitano, M. R., Friend, C. R. L., Bennett, V. C., and Chivas, A. R.: Isua (Greenland) ~3700 Ma meta-serpentinite olivine Mg# and δ18O signatures show connection between the early mantle and hydrosphere: Geodynamic implications, Precambrian Res., 361, 106249, https://doi.org/10.1016/j.precamres.2021.106249, 2021.
Reuber (1982)	Olivine reserves	Reuber, I., Michard, A., Chalouan, A., Juteau, T., and Jermoumi, B.: Structure and emplacement of the Alpine-type peridotites from Beni Bousera, Rif, Morocco: A polyphase tectonic interpretation, Tectonophysics, 82, 231–251, https://doi.org/10.1016/0040-1951(82)90047-6, 1982.
Su (2016)	Olivine reserves	Su, B., Chen, Y., Guo, S., and Liu, J.: Origins of orogenic dunites: Petrology, geochemistry, and implications, Gondwana Res., 29, 41–59, https://doi.org/10.1016/j.gr.2015.08.001, 2016.
Sufriadin (2020)	Olivine reserves	Sufriadin, Widodo, S., Thamrin, M., Maulana, A., Ito, A., and Otake, T.: The nature of ultramafic rocks from Sulawesi, Indonesia and their suitability for CO2 sequestration, IOP Conf. Ser. Earth Environ. Sci., 589, 012024, https://doi.org/10.1088/1755-1315/589/1/012024, 2020.
Sundermeyer (2020)	Olivine reserves	Sundermeyer, C., Gätjen, J., Weimann, L., and Wörner, G.: Timescales from magma mixing to eruption in alkaline volcanism in the Eifel volcanic fields, western Germany, Contrib. Mineral. Petrol., 175, 77, https://doi.org/10.1007/s00410-020-01715-y, 2020.
Thomson (2013)	Olivine reserves	Thomson, A. and Maclennan, J.: The Distribution of Olivine Compositions in Icelandic Basalts and Picrites, J. Petrol., 54, 745–768, https://doi.org/10.1093/petrology/egs083, 2013.
Tommasi (2006)	Olivine reserves	Tommasi, A., Vauchez, A., Godard, M., and Belley, F.: Deformation and melt transport in a highly depleted peridotite massif from the Canadian Cordillera: Implications to seismic anisotropy above subduction zones, Earth Planet. Sci. Lett., 252, 245–259, https://doi.org/10.1016/j.epsl.2006.09.042, 2006.
Ulianov (2007)	Olivine reserves	Ulianov, A., Müntener, O., Ulmer, P., and Pettke, T.: Entrained Macrocryst Minerals as a Key to the Source Region of Olivine Nephelinites: Humberg, Kaiserstuhl, Germany, J. Petrol., 48, 1079–1118, https://doi.org/10.1093/petrology/egm011, 2007.
