# Supplementary material for: Review and syntheses: Ocean alkalinity enhancement and carbon dioxide removal through marine enhanced rock weathering using olivine
Source: Copernicus journal article supplement (doi:10.5194/bg-22-355-2025), 2025-01-21
Supplement: Supplementary file 2 [file bg-22-355-2025-supplement.zip]

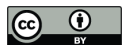

*Supplement of*

**Review and syntheses: Ocean alkalinity enhancement and carbon dioxide removal through marine enhanced rock weathering using olivine**

**Luna J. J. Geerts et al.**

*Correspondence to:* Luna J. J. Geerts ([luna.geerts@uantwerpen.be](mailto:luna.geerts@uantwerpen.be))

- [bg-22-355-2025-supplement-title-page.pdf](#)
- [S1\\_review\\_OAE.pdf](#)
- [S2\\_supplementary\\_data.xlsx](#)

The copyright of individual parts of the supplement might differ from the article licence.
